# Supplementary material for: Quenching of tryptophan fluorescence in various proteins by a series of small nickel complexes
Source: Royal Society of Chemistry journal article supplement (doi:10.1039/c2dt12169g), 2012-01-01
Supplement: c2dt12169g.pdf [file c2dt12169g.pdf]

## Supporting Information

### Quenching of Tryptophan Fluorescence in Various Proteins by a Series of Small Nickel Complexes

Heather F. Crouse<sup>1</sup>, Julianne Potoma<sup>1</sup>, Farhat Nejrabi<sup>2</sup>, Deanna L. Snyder<sup>1</sup>, Balwant S. Chohan<sup>2</sup> and Swarna Basu<sup>1</sup>

<sup>1</sup> Department of Chemistry, Susquehanna University, 514 University Avenue Selinsgrove, PA 17870

<sup>2</sup> Current address: Penn State Harrisburg, 777 West Harrisburg Pike, Middletown, PA 17057

## Supplementary Information 1

### Synthesis of Nickel Complexes & Characterization Data

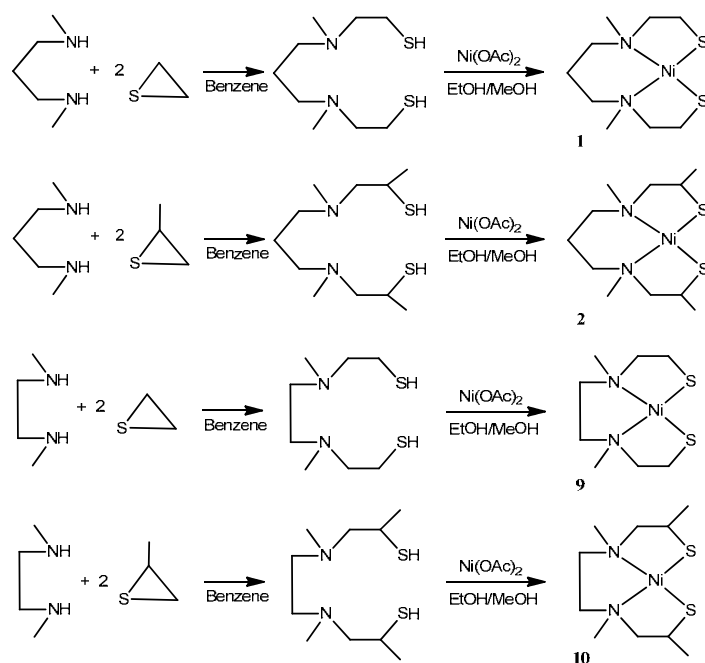

**Scheme 1:** Synthesis of Complexes **1**, **2**, **9**, and **10**.

**Complex 1:** (Ni-Pr-Et). Synthesis of ( $N,N'$ -dimethyl- $N,N'$ -bis(2-mercaptoethyl)-1,3-propanediaminato)-nickel(II).

The ligand  $N,N'$ -dimethyl- $N,N'$ -bis(2-mercaptoethyl)-1,3-propanediamine was prepared by literature methods<sup>100</sup>. The red colored neutral monomeric nickel complex was synthesized (**Scheme 1, above**) by combining the ligand with  $\text{Ni}(\text{OAc})_2 \cdot 4\text{H}_2\text{O}$  in a methanol/ethanol (1:1) solvent mix, according to published procedures<sup>101</sup>. ESI-MS(+),  $m/z$  (relative intensity), as shown in **SI (#7a)**, 447.0(12) isotopic cluster (tetranuclear species / 2,  $(\text{Ni}_4\text{C}_{27}\text{H}_{60}\text{N}_6\text{S}_6) / 2$ )<sup>+</sup> calculated mass = 446.0); 308.0(85) cluster (trinuclear species / 2,  $(\text{Ni}_3\text{C}_{18}\text{H}_{40}\text{N}_4\text{S}_4) / 2$ )<sup>+</sup> calculated mass = 307.0); 279.0(100) cluster (parent mononuclear complex,  $(\text{NiC}_9\text{H}_{21}\text{N}_2\text{S}_2)$ )<sup>+</sup>, calculated mass = 279.0). MS/MS of 447.0 cluster gives the 308.0(76) cluster and the 279.0(100) cluster. The ESI-MS spectra of **1** can be simulated well: Simulated MS for 447.0 is shown in **SI (#7b)**, for 308.0 in **SI (#7c)**, and for 279.0 in **SI (#7d)**.

**Complex 2:** (Ni-Pr-Pr or Ni-dsppm).

(a) Synthesis of  $N,N'$ -dimethyl- $N,N'$ -bis(2-sulfanylpropyl)propylenediamine) ligand.

A solution of  $N,N'$ -dimethyl-1,3-propanediamine (5.5997 g, 53.16 mmol) in 5 mL benzene was placed in Schlenk reaction tube, and the temperature was raised to 40°C. Propylene sulfide (8.2

mL, 111.64 mmol) in 5 mL benzene was then added dropwise, the temperature was raised to 80°C. The mixture was stirred overnight at 80°C (**Scheme 1, above**). The oily product was washed with 4 x 10 mL of distilled water in a 125 mL separatory funnel. The ligand solution was then dried over MgSO<sub>4</sub> and gravity filtered into a tarred 25 mL round-bottom flask. The benzene was removed to yield a colorless viscous liquid (4.4093 g, 17.64 mmol, 33.2% yield). NMR (400MHz Joel, in CDCl<sub>3</sub>) produced a spectrum with the corresponding peaks: 2.25t (4H), 1.60q (3H), 2.19m (6H), 2.37m (4H), 3.20m (2H), 1.57d (2H), 1.19d (6H)

(b) Synthesis of N,N'-dimethyl-N,N'-bis(2-sulfanylpropyl)propylenediamine-nickel(II).

The N,N'-dimethyl-N,N'-bis(2-sulfanylpropyl)propylenediamine ligand (3.983 g, 15.93 mmol) in 30 mL of 1:1, EtOH:MeOH was placed in a 250 mL round-bottom flask in an ice bath under an Ar atmosphere and stirred for 10 mins. Ni(OAc)<sub>2</sub>·4H<sub>2</sub>O (3.2128 g, 13.27 mmol) was dissolved in ethanol (120 mL) under an Ar atmosphere, and then added drop wise to the ligand. The mixture was allowed to stir for 12 hrs (**Scheme 1, above**). The product was filtered, solvent removed under vacuum, and the solid material re-dissolved in minimum MeOH and purified using a silica gel column (20 mm x 300 mm; 60-200 mesh Aldrich grade 62 silica gel) with MeOH as the eluent. The purple-red colored fraction was reduced to 25 mL, and diethyl ether was layered onto the solution, and left in a refrigerator at 5°C for eight days. The cubic shaped clear red-purple crystals of **2** were collected and analyzed by X-ray crystallography (**Figure 2**). CHN microanalysis, Anal Calcd for NiC<sub>11</sub>H<sub>24</sub>N<sub>2</sub>S<sub>2</sub>: C, 43.01; H, 7.88; N, 9.12. Found: C, 43.10; H, 8.07; N, 8.48. IR (KBr, cm<sup>-1</sup>): 1652, 1467, 1456, 1442, 1410, 1364, 1297, 1143, 1046, 1009, 985, 827. UV-vis in MeOH, λ(nm)(ε (M<sup>-1</sup>cm<sup>-1</sup>)): 212 (8605), 244 (9105), 282(3835).

**Complex 9:** (Ni-Et-Et or Ni-dsdm). Synthesis of (N,N'-dimethyl-N,N'-bis(2-mecaptoethyl)-ethylenediaminato)-nickel(II).

The ligand and the neutral nickel complex, was synthesized in a manner similar to that reported for Complex **1**<sup>100, 101</sup>. The synthesis of the ligand<sup>106,107</sup> and the nickel complex was synthesized by modification of published procedures<sup>108,109,y</sup> (**Scheme 1, above**). CHN microanalysis, Anal Calcd (found) for NiC<sub>8</sub>H<sub>18</sub>N<sub>2</sub>S<sub>2</sub>: C, 36.25 (34.66); H, 6.85 (6.48); N, 10.57 (9.79). Slow evaporation of diethyl ether onto an ethanol solution of the product, yielded thin pink-red plates after 22 days, suitable for X-ray diffraction studies. The crystal structure of complex **9** was recently reported.<sup>y</sup>

**Complex 10:** (Ni-Et-Pr or Ni-dspem). The ligand and the neutral nickel complex, was synthesized in a manner *similar* to that reported for Complex **1**<sup>100, 101</sup>.

(a) Synthesis of ligand, N,N'-dimethyl-N,N'-bis(2-sulfanylpropyl)ethylenediamine)

A solution of N,N-dimethyl-1,2-ethylenediamine (5.344 g, 60.62 mmol) in 5 mL benzene was placed in Schlenk reaction tube, and the temperature was raised to 40°C. Propylene sulfide (9.44 g, 9.98 ml, 127.33 mmol) in 5 mL benzene was then added dropwise. The reaction was allowed to stir overnight at 80°C. The resulting solution was washed with 3 x 15 mL of distilled water in a 125 mL separatory funnel then dried over MgSO<sub>4</sub> and gravity filtered (**Scheme 1,**

**above**). The benzene was removed to yield the product as a colorless viscous liquid (9.72 g, 68% yield).

(b) Synthesis of N,N'-dimethyl-N,N'-bis(2-sulfanylpropyl) ethylenediamine nickel(II).

The N,N'-dimethyl-N,N'-bis(2-sulfanylpropyl)ethylenediamine ligand (5.33 g, 22.58 mmol) in 40 mL of 1:1, EtOH:MeOH was placed in a 250 mL round-bottom flask in an ice bath under an Ar atmosphere and left to stir for 15 mins. Ni(OAc)<sub>2</sub> (5.62 g, 22.58 mmol) was dissolved in ethanol (60 mL) under an inert atmosphere, and cooled on ice. The Ni(OAc)<sub>2</sub> solution was then added drop wise to the ligand, and the resulting red-brown colored mixture was left to stir for 14 hrs (**Scheme 1, above**). The nickel product was filtered, the solvent removed under vacuum, and the solid product re-dissolved in minimum MeOH and purified using a silica gel column (20 mm x 270 mm; 60-200 mesh Aldrich grade 62 silica gel), with MeOH as the eluent. The purple-red colored fraction was reduced to 25 mL, and diethyl ether was added to precipitate the product. CHN microanalysis, Anal Calcd (found) for NiC<sub>10</sub>H<sub>22</sub>N<sub>2</sub>S<sub>2</sub>: C, 40.98 (39.87); H, 7.57(7.41); N, 9.56(9.28). Slow evaporation of diethyl ether onto a (9:1) MeOH/MeCN solution of the product red plate shaped crystals after 3 days, suitable for X-ray diffraction studies (**Figure 3**).

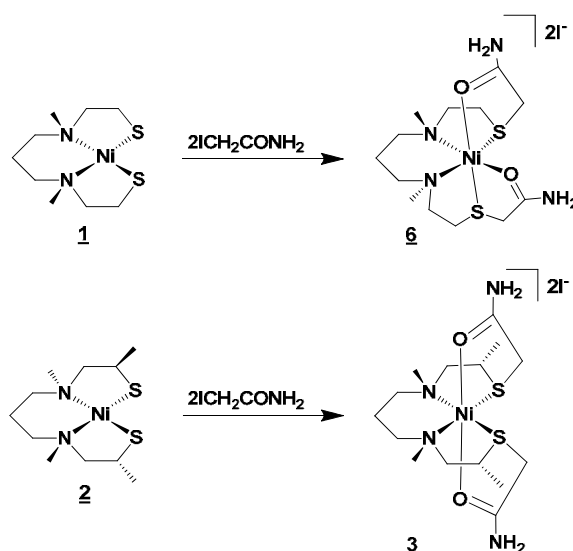

**Scheme 2:** Di-alkylation of complex **1** and **2** with iodoacetamide to give **6** and **3**, respectively.

**Complex 3:** (Ni-Pr-Pr-Iodo). Synthesis of (N,N'-dimethyl-N,N'-bis(2-methyl-3-thiapentanamide)-1,3-propanediaminato)-nickel(II) iodide.

Alkylation of complex **2** with two equivalents of iodoacetamide yields a high spin blue-purple colored complex, with pseudo octahedral nickel centers and iodide counterions (**Scheme 2, above**). The iodoacetamide derivative was crystallized from MeOH/MeCN solutions as thin plates, which crumble when taken out of solvent. The complex is nevertheless stable in the solid state.

In a round bottomed 250 mL flask, 778 mg (2.53 mmol) of complex **2** was dissolved in 60 mL of a 1:1 mix of MeCN and MeOH. The flask was placed in an Ar environment and allowed to

stir for 15 minutes. Iodoacetamide (942 mg, 5.09 mmol) was placed in a small test tube along with 3 mL of MeOH/MeCN solution and dissolved. The iodoacetamide solution was then added to the solution of **2** using a 5 mL syringe. The solution immediately changed from a red-purple color to blue. The solution was left to stir overnight. The reaction mixture was then reduced by rotary evaporation to approximately 10 mL, and filtered through a fine glass frit funnel. The solution was placed into a test tube, and an equal amount of diethyl ether was carefully layered on to the top of the solution and left to stand for 4 days. Blue-purple crystals that appeared (**Figure 4**) were collected by filtration and dried under vacuum to give 878 mg (82% yield) of a blue colored powder. CHN microanalysis, Anal Calcd (found) for NiC<sub>15</sub>H<sub>32</sub>N<sub>4</sub>S<sub>2</sub>O<sub>2</sub>I<sub>2</sub>: C, 23.55 (23.23); H, 4.31 (4.22); N, 4.99 (4.82).  $\mu_{\text{eff}} = 2.82$  (n=2). IR (cm<sup>-1</sup>):  $\nu(\text{N-H})$  3275s,  $\nu(\text{C-H})$  3100s,  $\nu(\text{C=O})$  1645s,  $\nu(\text{C-N})$  1375s.

**Complex 6:** (Ni-Pr-Et-Iodo). Synthesis of (N,N'-dimethyl-N-N'-bis(3-thiapentanamide)-1,3-propanediaminato)-nickel(II) iodide.

The alkylation of Complex **1** with two equivalents of iodoacetamide yields a high spin blue colored complex, with pseudo octahedral nickel centers and iodide counterions (**Scheme 2, above**). The iodoacetamide derivative was readily crystallized from MeOH/MeCN solutions and is very stable in the solid state.

In a 250 mL flask, 813 mg (2.91 mmol) of complex **1** was dissolved in 120 mL of a 1:1 mix of MeCN and MeOH. To this was added 1.0776 g (5.83 mmol) of iodoacetamide dissolved in 30 mL of MeCN. The solution changed from red to green within 15 minutes and then to a blue color overnight. The resulting solution was reduced in volume to 60 mL and filtered. Slow addition of diethyl ether yielded blue colored crystals of diffraction quality within 8 days (**Figure 5**). Filtration and subsequent drying under vacuum gave 1.66 g (88% yield) of a light blue colored powder. CHN microanalysis, Anal Calcd (found) for NiC<sub>13</sub>H<sub>28</sub>N<sub>4</sub>S<sub>2</sub>O<sub>2</sub>I<sub>2</sub>.CH<sub>3</sub>OH: C, 24.69 (24.97); H, 4.74 (4.60); N, 8.23 (8.18).  $\mu_{\text{eff}} = 2.82$  (n=2). IR (cm<sup>-1</sup>):  $\nu(\text{N-H})$  3280s,  $\nu(\text{C-H})$  3100s,  $\nu(\text{C=O})$  1650s,  $\nu(\text{C-N})$  1380s. ESI-MS(+) m/z (relative intensity), as shown in **SI (#8a)**, 392.9(58) isotopic cluster (parent complex, (NiC<sub>13</sub>H<sub>27</sub>N<sub>4</sub>O<sub>2</sub>S<sub>2</sub>)<sup>+</sup> calculated mass = 393.1); 335.9(100) cluster (loss of one acetamide, (NiC<sub>11</sub>H<sub>24</sub>N<sub>3</sub>OS<sub>2</sub>)<sup>+</sup> calculated mass = 336.1); 278.9(13) cluster (loss of both acetamides). ESI-MS(-) m/z (relative intensity): 127.0(100) (iodide counterion). The ESI-MS spectra of **6** can be simulated well: Simulated MS for 392.9 is shown in **SI (#8b)**.

**Complex 4:** (Ni(py<sub>2</sub>tn)Cl<sub>2</sub>·H<sub>2</sub>O). Synthesis of N,N'-bis(2-pyridylmethylene)-1,3-diaminopropyl nickel(II) chloride.

The complex was synthesized according to published procedures<sup>102</sup>. The Schiff base ligand (py<sub>2</sub>tn) was derived from pyridine-2-carboxaldehyde and 1,3-diamino-2-propanol in isopropyl alcohol. The nickel complex was made *in-situ* by addition of nickel (II) chloride hexahydrate dissolved in absolute ethanol to the Schiff base. Recrystallization from water gave dark olive green crystals, which when dried *in vacuo* gave the product in excellent yield.

**Complex 7:** (Ni(py<sub>2</sub>tn-OH)Cl<sub>2</sub>). Synthesis of N,N'-Bis(2-pyridylmethylene)1,3-diamino-2-propanol nickel(II) chloride.

The ligand<sup>104</sup>, and the nickel complex<sup>102</sup> were synthesized according to modification of published procedures. The Schiff base ligand (pya<sub>2</sub>tn) is derived from pyridine-2-carboxaldehyde and 1,3-diamino-2-propanol. The resulting yellow colored oil was crystallized (only once) by addition of absolute ethanol to the neat oil. The nickel complex is made by addition of the Schiff base dissolved in absolute ethanol to a refluxing solution of nickel(II) chloride hexahydrate and 2,2-dimethoxypropane. The solution was slowly cooled yielding green colored crystals, which were dried *in vacuo* to give an excellent yield.

**Complex 5:** (Ni(en)<sub>2</sub>Cl<sub>2</sub>). Synthesis of bis(ethylenediamine)-nickel(II) chloride

Bis(ethylenediamine)-nickel(II) chloride was synthesized according to published procedures from tris(ethylenediamine)nickel(II) chloride via redistribution of ligands in methanol<sup>103</sup>.

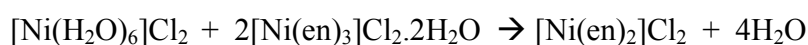

In a 250 mL round bottomed flask, 10 g (42.1 mmol) of nickel (II) chloride hexahydrate, 24.1 g (84.3 mmol) of tris(ethylenediamine)-nickel(II) chloride dihydrate, 80 mL of MeOH, and 2 mL of water was gently refluxed for 10 minutes. The dark blue solution was filtered through a fine frit funnel whilst still warm. The filtrate was cooled, and 110 mL of acetone was added, forming a blue-purple colored product. The precipitate was filtered, and washed with 10 mL of acetone, and further dried in an oven at 105°C for 50 min. Yield was 8.60 g (82%).

**Complex 11:** (Ni(en)<sub>3</sub>Cl<sub>2</sub>·2H<sub>2</sub>O). Tris(ethylenediamine)-nickel(II) chloride dihydrate was synthesized from the nickel(II) chloride salt:

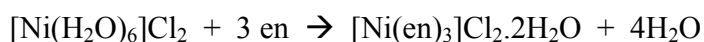

In a 125 mL Erlenmeyer flask, 11.8 g (49.6 mmol) of was dissolved in 20 mL of warm deionized water. The mixture was cooled in an ice bath, and to this was added 10 mL of (150 mmol) ethylenediamine. Cooled 95% ethanol (15 mL) was then slowly added to the solution to form a purple colored precipitate. The precipitate was filtered, wash with two 10 mL volumes of cold 95% ethanol, 10 mL of acetone, and air dried to yield 15.40 g (90%) of product.

**Complex 12:** (Ni(NH<sub>3</sub>)<sub>6</sub>Cl<sub>2</sub>). Hexaammine nickel(II) chloride was synthesized from the nickel(II) chloride salt:

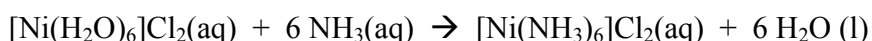

In a 125 mL Erlenmeyer flask, 6 g (25.2mmol) of nickel(II) chloride hexahydrate was dissolved in 10 mL of warm deionized water. To this was slowly added 20 mL of concentrated NH<sub>3</sub> solution. The mixture was cooled in an ice bath, and then 15 mL of cold 95% ethanol was added to precipitate a lavender colored product. The solid was vacuum filtered, washed with two 5 mL volumes of cold 95 % ethanol, 10 mL of acetone, and air dried to give 5.52 g (94%) of product.

**Complex 8:** (Ni(EDTA)-H<sub>2</sub>O·Na). Synthesis of the nickel(II) salt of ethylenediamine-tetraacetate.

Nickel (II) carbonate was made by reacting sodium carbonate (20 g, 84 mmol) with nickel chloride (8.92 g, 84 mmol) in water. The solution was stirred and heated at 90°C for 30mins. The

green solution was cooled, and ethanol was added to precipitate light green colored  $\text{NiCO}_3$  (9.88 g, 99% yield):

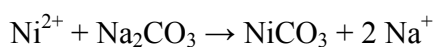

The  $\text{H}_4\text{EDTA}$  ligand was prepared by acidification of an aqueous solution of reagent grade  $\text{Na}_2\text{H}_2\text{EDTA} \cdot 2\text{H}_2\text{O}$  with concentrated  $\text{HCl}$ . Powdered nickel (II) carbonate was added in small increments, totaling 8.00 g (67 mmol) to 19.58 g (67 mmol) of  $\text{H}_4\text{EDTA}$  partially dissolved in 120 mL of water. This slurry was warmed and stirred to generate a uniform product. The solution was adjusted to pH 2 with  $\text{HCl}$ , concentrated to about 40 mL in a crystallizing dish, and left to stand in the open air for 8 days to yield blue colored plate and rod-like crystals. (**Figure 6**). The product was further dried in a vacuum desiccator to give a yield of 22.24 g (86%), based on the  $\text{Na}[\text{Ni-EDTA} \cdot \text{H}_2\text{O}]$  crystal structure. The crystal structure shows the EDTA is functioning as a quinque-dentate ligand. The structure is similar, with minor differences, to that reported in literature<sup>105</sup>.

## Supplementary Information 2

Table 1. Crystal data and structure refinement for bsc1a (**Complex 2**).

|                                   |                                                                                                        |
|-----------------------------------|--------------------------------------------------------------------------------------------------------|
| Identification code               | bsc1a                                                                                                  |
| Empirical formula                 | C11 H24 N2 Ni S2                                                                                       |
| Formula weight                    | 307.15                                                                                                 |
| Temperature                       | 200(2) K                                                                                               |
| Wavelength                        | 0.71073 Å                                                                                              |
| Crystal system, space group       | Monoclinic, P2(1)/n                                                                                    |
| Unit cell dimensions              | a = 10.5547(10) Å alpha = 90°<br>B = 12.3943(11) Å beta = 111.126(5)°<br>C = 11.5831(11) Å gamma = 90° |
| Volume                            | 1413.4(2) Å <sup>3</sup>                                                                               |
| Z, Calculated density             | 4, 1.443 Mg/m <sup>3</sup>                                                                             |
| Absorption coefficient            | 1.646 mm <sup>-1</sup>                                                                                 |
| F(000)                            | 656                                                                                                    |
| Crystal size                      | 0.20 x 0.20 x 0.02 mm                                                                                  |
| Theta range for data collection   | 2.50 to 43.94 deg.                                                                                     |
| Limiting indices                  | -20<=h<=20, -22<=k<=24, -22<=l<=21                                                                     |
| Reflections collected / unique    | 39600 / 10794 [R(int) = 0.0866]                                                                        |
| Completeness to theta = 43.94     | 97.9 %                                                                                                 |
| Absorption correction             | psi-scan                                                                                               |
| Refinement method                 | Full-matrix least-squares on F <sup>2</sup>                                                            |
| Data / restraints / parameters    | 10794 / 0 / 149                                                                                        |
| Goodness-of-fit on F <sup>2</sup> | 0.956                                                                                                  |
| Final R indices [I>2sigma(I)]     | R1 = 0.0440, wR2 = 0.1022                                                                              |
| R indices (all data)              | R1 = 0.0829, wR2 = 0.1180                                                                              |
| Largest diff. peak and hole       | 2.049 and -0.882 e.Å <sup>-3</sup>                                                                     |



Table 2. Atomic coordinates ( $\times 10^4$ ) and equivalent isotropic displacement parameters ( $\text{\AA}^2 \times 10^3$ ) for bscla. U(eq) is defined as one third of the trace of the orthogonalized Uij tensor.

|       | x        | y       | z       | U(eq) |
|-------|----------|---------|---------|-------|
| Ni(1) | 1023(1)  | 6323(1) | 1701(1) | 20(1) |
| C(1)  | 4854(1)  | 6058(1) | 1164(2) | 42(1) |
| C(2)  | 3315(1)  | 6063(1) | 667(1)  | 31(1) |
| C(3)  | 2785(1)  | 7208(1) | 625(1)  | 31(1) |
| C(4)  | 547(1)   | 6787(1) | -856(1) | 36(1) |
| C(5)  | 942(1)   | 8381(1) | 463(1)  | 36(1) |
| C(6)  | -563(2)  | 8589(1) | 208(2)  | 43(1) |
| C(7)  | -1322(1) | 7712(1) | 628(1)  | 33(1) |
| C(8)  | -54(1)   | 7983(1) | 2828(1) | 35(1) |
| C(9)  | -1441(1) | 6395(1) | 2092(1) | 28(1) |
| C(10) | -721(1)  | 5745(1) | 3245(1) | 29(1) |
| C(11) | -1599(1) | 4801(1) | 3343(1) | 39(1) |
| N(1)  | 1308(1)  | 7228(1) | 398(1)  | 23(1) |
| N(2)  | -517(1)  | 7179(1) | 1815(1) | 25(1) |
| S(1)  | 2622(1)  | 5268(1) | 1629(1) | 37(1) |
| S(2)  | 900(1)   | 5305(1) | 3180(1) | 29(1) |

Table 3. Bond lengths [Å] and angles [deg] for bscla.

---

|                       |             |
|-----------------------|-------------|
| Ni (1) -N(2)          | 1.9844 (9)  |
| Ni (1) -N(1)          | 1.9888 (9)  |
| Ni (1) -S (1)         | 2.1605 (3)  |
| Ni (1) -S (2)         | 2.1692 (3)  |
| C (1) -C (2)          | 1.5149 (18) |
| C (2) -C (3)          | 1.5194 (18) |
| C (2) -S (1)          | 1.8260 (13) |
| C (3) -N (1)          | 1.4848 (15) |
| C (4) -N (1)          | 1.4871 (16) |
| C (5) -N (1)          | 1.4886 (16) |
| C (5) -C (6)          | 1.530 (2)   |
| C (6) -C (7)          | 1.529 (2)   |
| C (7) -N (2)          | 1.4855 (16) |
| C (8) -N (2)          | 1.4819 (15) |
| C (9) -N (2)          | 1.4911 (15) |
| C (9) -C (10)         | 1.5093 (18) |
| C (10) -C (11)        | 1.5223 (18) |
| C (10) -S (2)         | 1.8228 (12) |
| <br>                  |             |
| N (2) -Ni (1) -N (1)  | 95.77 (4)   |
| N (2) -Ni (1) -S (1)  | 174.90 (3)  |
| N (1) -Ni (1) -S (1)  | 88.72 (3)   |
| N (2) -Ni (1) -S (2)  | 88.57 (3)   |
| N (1) -Ni (1) -S (2)  | 175.00 (3)  |
| S (1) -Ni (1) -S (2)  | 87.044 (14) |
| C (1) -C (2) -C (3)   | 110.39 (12) |
| C (1) -C (2) -S (1)   | 112.07 (10) |
| C (3) -C (2) -S (1)   | 107.42 (8)  |
| N (1) -C (3) -C (2)   | 111.86 (10) |
| N (1) -C (5) -C (6)   | 114.96 (11) |
| C (7) -C (6) -C (5)   | 116.46 (11) |
| N (2) -C (7) -C (6)   | 114.83 (11) |
| N (2) -C (9) -C (10)  | 112.25 (9)  |
| C (9) -C (10) -C (11) | 110.52 (10) |
| C (9) -C (10) -S (2)  | 107.69 (8)  |
| C (11) -C (10) -S (2) | 112.25 (10) |
| C (3) -N (1) -C (4)   | 109.29 (9)  |
| C (3) -N (1) -C (5)   | 106.36 (9)  |
| C (4) -N (1) -C (5)   | 110.10 (10) |
| C (3) -N (1) -Ni (1)  | 106.99 (7)  |
| C (4) -N (1) -Ni (1)  | 110.95 (8)  |
| C (5) -N (1) -Ni (1)  | 112.95 (8)  |
| C (8) -N (2) -C (7)   | 110.44 (10) |
| C (8) -N (2) -C (9)   | 108.84 (9)  |
| C (7) -N (2) -C (9)   | 106.79 (9)  |
| C (8) -N (2) -Ni (1)  | 111.57 (7)  |
| C (7) -N (2) -Ni (1)  | 112.65 (8)  |
| C (9) -N (2) -Ni (1)  | 106.28 (7)  |
| C (2) -S (1) -Ni (1)  | 100.81 (4)  |
| C (10) -S (2) -Ni (1) | 100.51 (4)  |

---

Table 4. Anisotropic displacement parameters ( $\text{\AA}^2 \times 10^3$ ) for bsc1a.  
The anisotropic displacement factor exponent takes the form:  
 $-2 \pi^2 [ h^2 a^2 U_{11} + \dots + 2 h k a^* b^* U_{12} ]$

|        | U11    | U22    | U33    | U23     | U13    | U12    |
|--------|--------|--------|--------|---------|--------|--------|
| Ni (1) | 18 (1) | 18 (1) | 23 (1) | 0 (1)   | 6 (1)  | 1 (1)  |
| C (1)  | 28 (1) | 52 (1) | 46 (1) | -2 (1)  | 14 (1) | 3 (1)  |
| C (2)  | 26 (1) | 35 (1) | 32 (1) | -1 (1)  | 13 (1) | 3 (1)  |
| C (3)  | 27 (1) | 29 (1) | 38 (1) | 0 (1)   | 12 (1) | -4 (1) |
| C (4)  | 34 (1) | 42 (1) | 27 (1) | 0 (1)   | 5 (1)  | 0 (1)  |
| C (5)  | 38 (1) | 21 (1) | 50 (1) | 4 (1)   | 17 (1) | 2 (1)  |
| C (6)  | 38 (1) | 31 (1) | 60 (1) | 18 (1)  | 18 (1) | 13 (1) |
| C (7)  | 24 (1) | 31 (1) | 42 (1) | 6 (1)   | 8 (1)  | 8 (1)  |
| C (8)  | 32 (1) | 27 (1) | 47 (1) | -14 (1) | 15 (1) | -3 (1) |
| C (9)  | 19 (1) | 31 (1) | 34 (1) | -3 (1)  | 9 (1)  | -2 (1) |
| C (10) | 24 (1) | 35 (1) | 29 (1) | -3 (1)  | 11 (1) | -4 (1) |
| C (11) | 34 (1) | 47 (1) | 40 (1) | 5 (1)   | 17 (1) | -9 (1) |
| N (1)  | 23 (1) | 20 (1) | 26 (1) | 0 (1)   | 7 (1)  | -1 (1) |
| N (2)  | 19 (1) | 22 (1) | 33 (1) | -4 (1)  | 7 (1)  | 0 (1)  |
| S (1)  | 37 (1) | 31 (1) | 50 (1) | 14 (1)  | 26 (1) | 16 (1) |
| S (2)  | 27 (1) | 32 (1) | 30 (1) | 7 (1)   | 11 (1) | 3 (1)  |

### **Supplementary Information 3**

#### **Crystal Structure Information for btw5s (Complex 3).**

A blue block shaped crystal of btw5 (C<sub>15</sub> H<sub>32</sub> N<sub>4</sub> Ni O<sub>4</sub> S<sub>2</sub>, 2(C H<sub>4</sub> O), 2(I)) with approximate dimensions 0.21 x 0.32 x 0.37 mm, was used for the X-ray crystallographic analysis. The X-ray intensity data were measured at 298(2) K, on a Bruker SMART APEX CCD area detector system equipped with a graphite monochromator and a MoK $\alpha$  fine-focus sealed tube ( $\lambda = 0.71073 \text{ \AA}$ ) operated at 1600 watts power (50 kV, 32 mA). The detector was placed at a distance of 5.8 cm from the crystal.

A total of 1850 frames were collected with a scan width of 0.3° in  $\omega$  and an exposure time of 10 seconds/frame. The total data collection time was about 8 hours. The frames were integrated with the Bruker SAINT software package using a narrow-frame integration algorithm. The integration of the data using a Triclinic unit cell yielded a total of 14030 reflections to a maximum  $\theta$  angle of 28.26° (0.90 Å resolution), of which 7086 were independent, completeness = 97.6%,  $R_{\text{int}} = 0.0130$ ,  $R_{\text{sig}} = 0.0206$  and 5972 were greater than  $2\sigma(I)$ . The final cell constants:  $a = 10.4046(12) \text{ \AA}$ ,  $b = 10.9123(12) \text{ \AA}$ ,  $c = 13.8838(16) \text{ \AA}$ ,  $\alpha = 87.671(2)^\circ$ ,  $\beta = 78.132(2)^\circ$ ,  $\gamma = 72.023(2)^\circ$ , volume =  $1466.9(3) \text{ \AA}^3$ , are based upon the refinement of the XYZ-centroids of 6974 reflections above  $20\sigma(I)$  with  $2.320^\circ < \theta < 28.167^\circ$ . Analysis of the data showed negligible decay during data collection. Data were corrected for absorption effects using the multi-scan technique (SADABS). The ratio of minimum to maximum apparent transmission was 0.5172.

The structure was solved and refined using the Bruker SHELXTL (Version 6.1) Software Package, using the space group P-1, with  $Z = 2$  for the formula unit, C<sub>17</sub> H<sub>40</sub> I<sub>2</sub> N<sub>4</sub> Ni O<sub>4</sub> S<sub>2</sub>. The final anisotropic full-matrix least-squares refinement on  $F^2$  with 279 variables converged at  $R1 = 4.90\%$ , for the observed data and  $wR2 = 14.46\%$  for all data. The goodness-of-fit was 1.036. The largest peak on the final difference map was  $2.983 \text{ e}^-/\text{\AA}^3$  and the largest hole was  $-1.825 \text{ e}^-/\text{\AA}^3$ . Based on the final model, the calculated density of the crystal is  $1.678 \text{ g/cm}^3$  and  $F(000)$  amounts to 736 electrons.

Table 1. Sample and crystal data for btw5.

|                                 |                                          |                            |
|---------------------------------|------------------------------------------|----------------------------|
| Identification code             | btw5                                     |                            |
| Empirical formula               | C17 H40 I2 N4 Ni O4 S2                   |                            |
| Formula weight                  | 741.16                                   |                            |
| Temperature                     | 298(2) K                                 |                            |
| Wavelength                      | 0.71073 Å                                |                            |
| Crystal size                    | 0.37 x 0.32 x 0.21 mm                    |                            |
| Crystal habit                   | blue block                               |                            |
| Crystal system                  | Triclinic                                |                            |
| Space group                     | P-1                                      |                            |
| Unit cell dimensions            | a = 10.4046(12) Å                        | $\alpha = 87.671(2)^\circ$ |
|                                 | b = 10.9123(12) Å                        | $\beta = 78.132(2)^\circ$  |
|                                 | c = 13.8838(16) Å                        | $\gamma = 72.023(2)^\circ$ |
| Volume                          | 1466.9(3) Å <sup>3</sup>                 |                            |
| Z                               | 2                                        |                            |
| Density (calculated)            | 1.678 g/cm <sup>3</sup>                  |                            |
| Absorption coefficient          | 2.934 mm <sup>-1</sup>                   |                            |
| F(000)                          | 736                                      |                            |
|                                 |                                          |                            |
| Diffractionmeter                | CCD area detector                        |                            |
| Radiation source                | fine-focus sealed tube, MoK $\alpha$     |                            |
| Generator power                 | 1600 watts (50 kV, 32mA)                 |                            |
| Detector distance               | 5.8 cm                                   |                            |
| Data collection method          | phi and omega scans                      |                            |
| Theta range for data collection | 1.96 to 28.26°                           |                            |
| Index ranges                    | -13 ≤ h ≤ 13, -14 ≤ k ≤ 14, -18 ≤ l ≤ 18 |                            |

Table 2. Atomic coordinates and equivalent isotropic atomic displacement parameters ( $\text{\AA}^2$ ) for btw5.

U(eq) is defined as one third of the trace of the orthogonalized  $U_{ij}$  tensor.

|     | x           | y           | z          | U(eq)       |
|-----|-------------|-------------|------------|-------------|
| C1  | 0.9792(5)   | 0.3248(5)   | 0.3857(4)  | 0.0522(11)  |
| C2  | 0.9060(4)   | 0.2334(4)   | 0.4381(3)  | 0.0420(9)   |
| C3  | 1.2033(6)   | 0.2523(7)   | 0.1245(5)  | 0.0731(16)  |
| C4  | 1.0891(5)   | 0.2110(4)   | 0.1929(4)  | 0.0493(10)  |
| C5  | 1.0189(5)   | 0.1471(4)   | 0.1335(3)  | 0.0466(9)   |
| C6  | 0.9627(5)   | -0.0022(4)  | 0.2558(4)  | 0.0533(11)  |
| C7  | 0.8415(5)   | 0.0560(5)   | 0.1218(3)  | 0.0520(11)  |
| C8  | 0.7127(5)   | 0.0204(5)   | 0.1672(4)  | 0.0548(11)  |
| C9  | 0.5852(5)   | 0.1355(5)   | 0.1991(4)  | 0.0531(11)  |
| C10 | 0.5719(6)   | 0.1310(5)   | 0.3768(4)  | 0.0562(11)  |
| C11 | 0.4603(5)   | 0.3239(5)   | 0.2973(3)  | 0.0492(10)  |
| C12 | 0.4512(5)   | 0.4237(5)   | 0.3730(3)  | 0.0492(10)  |
| C13 | 0.3199(6)   | 0.5367(6)   | 0.3792(5)  | 0.0701(15)  |
| C14 | 0.6036(5)   | 0.5622(4)   | 0.2410(3)  | 0.0498(10)  |
| C15 | 0.6579(4)   | 0.4807(4)   | 0.1473(3)  | 0.0426(9)   |
| C16 | 0.892(2)    | 0.3663(13)  | 0.8478(13) | 0.263(12)   |
| O3  | 0.7300(7)   | 0.4118(6)   | 0.8783(5)  | 0.1067(19)  |
| O4  | 0.7594(7)   | 0.0785(9)   | 0.6562(4)  | 0.124(2)    |
| C17 | 0.6479(15)  | 0.0752(15)  | 0.6201(7)  | 0.178(7)    |
| I1  | 0.78886(4)  | 0.71976(4)  | 0.40706(3) | 0.06209(13) |
| I3  | 0.60964(5)  | 0.14225(4)  | 0.90216(3) | 0.07380(15) |
| N1  | 0.9039(4)   | 0.1062(3)   | 0.1936(3)  | 0.0416(7)   |
| N2  | 0.5849(4)   | 0.2098(4)   | 0.2875(3)  | 0.0426(7)   |
| N3  | 0.6364(5)   | 0.5419(4)   | 0.0649(3)  | 0.0613(11)  |
| N4  | 0.9424(5)   | 0.1860(5)   | 0.5202(3)  | 0.0611(11)  |
| Ni1 | 0.76266(5)  | 0.27167(5)  | 0.27326(3) | 0.03544(13) |
| O1  | 0.7221(3)   | 0.3631(3)   | 0.1466(2)  | 0.0443(6)   |
| O2  | 0.8128(3)   | 0.2089(3)   | 0.4068(2)  | 0.0445(6)   |
| S1  | 0.96051(11) | 0.35097(10) | 0.26065(8) | 0.0437(2)   |
| S2  | 0.60645(12) | 0.47247(10) | 0.35245(7) | 0.0435(2)   |

Table 3. Bond lengths (Å) for btw5.

|          |            |          |            |
|----------|------------|----------|------------|
| C1-C2    | 1.512(6)   | C1-S1    | 1.789(5)   |
| C1-H1A   | 0.9700     | C1-H1B   | 0.9700     |
| C2-O2    | 1.243(5)   | C2-N4    | 1.310(6)   |
| C3-C4    | 1.532(7)   | C3-H3C   | 0.9600     |
| C3-H3D   | 0.9600     | C3-H3E   | 0.9600     |
| C4-C5    | 1.520(7)   | C4-S1    | 1.830(5)   |
| C4-H4    | 0.9800     | C5-N1    | 1.487(6)   |
| C5-H5A   | 0.9700     | C5-H5B   | 0.9700     |
| C6-N1    | 1.486(5)   | C6-H6A   | 0.9600     |
| C6-H6B   | 0.9600     | C6-H6C   | 0.9600     |
| C7-N1    | 1.498(6)   | C7-C8    | 1.517(7)   |
| C7-H7A   | 0.9700     | C7-H7B   | 0.9700     |
| C8-C9    | 1.520(7)   | C8-H8A   | 0.9700     |
| C8-H8B   | 0.9700     | C9-N2    | 1.496(5)   |
| C9-H9A   | 0.9700     | C9-H9B   | 0.9700     |
| C10-N2   | 1.488(6)   | C10-H10A | 0.9600     |
| C10-H10B | 0.9600     | C10-H10C | 0.9600     |
| C11-N2   | 1.482(6)   | C11-C12  | 1.513(6)   |
| C11-H11A | 0.9700     | C11-H11B | 0.9700     |
| C12-C13  | 1.521(7)   | C12-S2   | 1.817(5)   |
| C12-H12  | 0.9800     | C13-H13A | 0.9600     |
| C13-H13B | 0.9600     | C13-H13C | 0.9600     |
| C14-C15  | 1.511(6)   | C14-S2   | 1.798(5)   |
| C14-H14A | 0.9700     | C14-H14B | 0.9700     |
| C15-O1   | 1.250(5)   | C15-N3   | 1.325(6)   |
| C16-O3   | 1.571(18)  | C16-H16A | 0.9600     |
| C16-H16B | 0.9600     | C16-H16C | 0.9600     |
| O3-H3    | 0.8200     | O4-C17   | 1.365(11)  |
| O4-H4O   | 0.8200     | C17-H17A | 0.9600     |
| C17-H17B | 0.9600     | C17-H17C | 0.9600     |
| N1-Ni1   | 2.121(3)   | N2-Ni1   | 2.128(4)   |
| N3-H3A   | 0.8600     | N3-H3B   | 0.8600     |
| N4-H4A   | 0.8600     | N4-H4B   | 0.8600     |
| Ni1-O1   | 2.042(3)   | Ni1-O2   | 2.063(3)   |
| Ni1-S2   | 2.4319(11) | Ni1-S1   | 2.4406(12) |

Symmetry transformations used to generate equivalent atoms (if any):

Table 4. Bond angles (°) for btw5.

|               |          |               |          |
|---------------|----------|---------------|----------|
| C2-C1-S1      | 113.7(3) | C2-C1-H1A     | 108.8    |
| S1-C1-H1A     | 108.8    | C2-C1-H1B     | 108.8    |
| S1-C1-H1B     | 108.8    | H1A-C1-H1B    | 107.7    |
| O2-C2-N4      | 122.1(4) | O2-C2-C1      | 121.5(4) |
| N4-C2-C1      | 116.3(4) | C4-C3-H3C     | 109.5    |
| C4-C3-H3D     | 109.5    | H3C-C3-H3D    | 109.5    |
| C4-C3-H3E     | 109.5    | H3C-C3-H3E    | 109.5    |
| H3D-C3-H3E    | 109.5    | C5-C4-C3      | 110.2(4) |
| C5-C4-S1      | 109.1(3) | C3-C4-S1      | 110.3(4) |
| C5-C4-H4      | 109.1    | C3-C4-H4      | 109.1    |
| S1-C4-H4      | 109.1    | N1-C5-C4      | 114.2(4) |
| N1-C5-H5A     | 108.7    | C4-C5-H5A     | 108.7    |
| N1-C5-H5B     | 108.7    | C4-C5-H5B     | 108.7    |
| H5A-C5-H5B    | 107.6    | N1-C6-H6A     | 109.5    |
| N1-C6-H6B     | 109.5    | H6A-C6-H6B    | 109.5    |
| N1-C6-H6C     | 109.5    | H6A-C6-H6C    | 109.5    |
| H6B-C6-H6C    | 109.5    | N1-C7-C8      | 114.8(4) |
| N1-C7-H7A     | 108.6    | C8-C7-H7A     | 108.6    |
| N1-C7-H7B     | 108.6    | C8-C7-H7B     | 108.6    |
| H7A-C7-H7B    | 107.5    | C7-C8-C9      | 114.0(4) |
| C7-C8-H8A     | 108.7    | C9-C8-H8A     | 108.7    |
| C7-C8-H8B     | 108.7    | C9-C8-H8B     | 108.7    |
| H8A-C8-H8B    | 107.6    | N2-C9-C8      | 115.4(4) |
| N2-C9-H9A     | 108.4    | C8-C9-H9A     | 108.4    |
| N2-C9-H9B     | 108.4    | C8-C9-H9B     | 108.4    |
| H9A-C9-H9B    | 107.5    | N2-C10-H10A   | 109.5    |
| N2-C10-H10B   | 109.5    | H10A-C10-H10B | 109.5    |
| N2-C10-H10C   | 109.5    | H10A-C10-H10C | 109.5    |
| H10B-C10-H10C | 109.5    | N2-C11-C12    | 114.4(4) |
| N2-C11-H11A   | 108.7    | C12-C11-H11A  | 108.7    |
| N2-C11-H11B   | 108.7    | C12-C11-H11B  | 108.7    |
| H11A-C11-H11B | 107.6    | C11-C12-C13   | 111.1(4) |
| C11-C12-S2    | 111.8(3) | C13-C12-S2    | 113.2(4) |
| C11-C12-H12   | 106.8    | C13-C12-H12   | 106.8    |
| S2-C12-H12    | 106.8    | C12-C13-H13A  | 109.5    |
| C12-C13-H13B  | 109.5    | H13A-C13-H13B | 109.5    |
| C12-C13-H13C  | 109.5    | H13A-C13-H13C | 109.5    |
| H13B-C13-H13C | 109.5    | C15-C14-S2    | 114.7(3) |
| C15-C14-H14A  | 108.6    | S2-C14-H14A   | 108.6    |
| C15-C14-H14B  | 108.6    | S2-C14-H14B   | 108.6    |
| H14A-C14-H14B | 107.6    | O1-C15-N3     | 121.5(4) |
| O1-C15-C14    | 122.4(4) | N3-C15-C14    | 116.0(4) |
| O3-C16-H16A   | 109.5    | O3-C16-H16B   | 109.5    |
| H16A-C16-H16B | 109.5    | O3-C16-H16C   | 109.5    |
| H16A-C16-H16C | 109.5    | H16B-C16-H16C | 109.5    |
| C16-O3-H3     | 109.5    | C17-O4-H4O    | 109.5    |
| O4-C17-H17A   | 109.5    | O4-C17-H17B   | 109.5    |
| H17A-C17-H17B | 109.5    | O4-C17-H17C   | 109.5    |
| H17A-C17-H17C | 109.5    | H17B-C17-H17C | 109.5    |
| C6-N1-C5      | 108.6(4) | C6-N1-C7      | 108.0(4) |
| C5-N1-C7      | 106.0(3) | C6-N1-Ni1     | 114.6(3) |
| C5-N1-Ni1     | 107.1(2) | C7-N1-Ni1     | 112.1(3) |
| C11-N2-C10    | 108.8(4) | C11-N2-C9     | 105.6(3) |
| C10-N2-C9     | 109.9(4) | C11-N2-Ni1    | 109.4(3) |



|            |            |            |            |
|------------|------------|------------|------------|
| C10-N2-Ni1 | 109.8(3)   | C9-N2-Ni1  | 113.2(3)   |
| C15-N3-H3A | 120.0      | C15-N3-H3B | 120.0      |
| H3A-N3-H3B | 120.0      | C2-N4-H4A  | 120.0      |
| C2-N4-H4B  | 120.0      | H4A-N4-H4B | 120.0      |
| O1-Ni1-O2  | 169.46(12) | O1-Ni1-N1  | 91.84(12)  |
| O2-Ni1-N1  | 94.12(13)  | O1-Ni1-N2  | 90.19(13)  |
| O2-Ni1-N2  | 97.78(13)  | N1-Ni1-N2  | 96.32(14)  |
| O1-Ni1-S2  | 83.83(9)   | O2-Ni1-S2  | 89.78(9)   |
| N1-Ni1-S2  | 174.96(10) | N2-Ni1-S2  | 86.30(10)  |
| O1-Ni1-S1  | 89.69(10)  | O2-Ni1-S1  | 82.06(9)   |
| N1-Ni1-S1  | 86.06(10)  | N2-Ni1-S1  | 177.61(10) |
| S2-Ni1-S1  | 91.32(4)   | C15-O1-Ni1 | 121.2(3)   |
| C2-O2-Ni1  | 122.9(3)   | C1-S1-C4   | 104.2(2)   |
| C1-S1-Ni1  | 96.71(16)  | C4-S1-Ni1  | 96.64(16)  |
| C14-S2-C12 | 104.9(2)   | C14-S2-Ni1 | 95.22(15)  |
| C12-S2-Ni1 | 96.35(15)  |            |            |

---

Symmetry transformations used to generate equivalent atoms (if any):

Table 5. Torsion angles (°) for btw5.

|                |            |                |             |
|----------------|------------|----------------|-------------|
| S1-C1-C2-O2    | -18.8(6)   | S1-C1-C2-N4    | 164.0(4)    |
| C3-C4-C5-N1    | -178.7(4)  | S1-C4-C5-N1    | -57.4(4)    |
| N1-C7-C8-C9    | 73.5(5)    | C7-C8-C9-N2    | -71.0(6)    |
| N2-C11-C12-C13 | -179.4(4)  | N2-C11-C12-S2  | 53.2(5)     |
| S2-C14-C15-O1  | -12.3(6)   | S2-C14-C15-N3  | 169.4(4)    |
| C4-C5-N1-C6    | -68.7(5)   | C4-C5-N1-C7    | 175.5(4)    |
| C4-C5-N1-Ni1   | 55.7(4)    | C8-C7-N1-C6    | 69.2(5)     |
| C8-C7-N1-C5    | -174.5(4)  | C8-C7-N1-Ni1   | -57.9(5)    |
| C12-C11-N2-C10 | 71.2(5)    | C12-C11-N2-C9  | -171.0(4)   |
| C12-C11-N2-Ni1 | -48.8(4)   | C8-C9-N2-C11   | 173.7(4)    |
| C8-C9-N2-C10   | -69.1(5)   | C8-C9-N2-Ni1   | 54.1(5)     |
| C6-N1-Ni1-O1   | -176.5(3)  | C5-N1-Ni1-O1   | 63.0(3)     |
| C7-N1-Ni1-O1   | -53.0(3)   | C6-N1-Ni1-O2   | 12.2(3)     |
| C5-N1-Ni1-O2   | -108.3(3)  | C7-N1-Ni1-O2   | 135.7(3)    |
| C6-N1-Ni1-N2   | -86.1(3)   | C5-N1-Ni1-N2   | 153.3(3)    |
| C7-N1-Ni1-N2   | 37.4(3)    | C6-N1-Ni1-S2   | 152.8(10)   |
| C5-N1-Ni1-S2   | 32.2(13)   | C7-N1-Ni1-S2   | -83.7(12)   |
| C6-N1-Ni1-S1   | 94.0(3)    | C5-N1-Ni1-S1   | -26.6(2)    |
| C7-N1-Ni1-S1   | -142.5(3)  | C11-N2-Ni1-O1  | -61.4(3)    |
| C10-N2-Ni1-O1  | 179.2(3)   | C9-N2-Ni1-O1   | 56.0(3)     |
| C11-N2-Ni1-O2  | 111.7(3)   | C10-N2-Ni1-O2  | -7.7(3)     |
| C9-N2-Ni1-O2   | -130.9(3)  | C11-N2-Ni1-N1  | -153.3(3)   |
| C10-N2-Ni1-N1  | 87.3(3)    | C9-N2-Ni1-N1   | -35.9(3)    |
| C11-N2-Ni1-S2  | 22.4(3)    | C10-N2-Ni1-S2  | -97.0(3)    |
| C9-N2-Ni1-S2   | 139.8(3)   | C11-N2-Ni1-S1  | 26(3)       |
| C10-N2-Ni1-S1  | -94(2)     | C9-N2-Ni1-S1   | 143(2)      |
| N3-C15-O1-Ni1  | 177.0(4)   | C14-C15-O1-Ni1 | -1.2(6)     |
| O2-Ni1-O1-C15  | -43.3(9)   | N1-Ni1-O1-C15  | -167.7(4)   |
| N2-Ni1-O1-C15  | 96.0(4)    | S2-Ni1-O1-C15  | 9.7(3)      |
| S1-Ni1-O1-C15  | -81.6(3)   | N4-C2-O2-Ni1   | -175.6(4)   |
| C1-C2-O2-Ni1   | 7.3(6)     | O1-Ni1-O2-C2   | -34.6(9)    |
| N1-Ni1-O2-C2   | 89.7(3)    | N2-Ni1-O2-C2   | -173.4(3)   |
| S2-Ni1-O2-C2   | -87.1(3)   | S1-Ni1-O2-C2   | 4.2(3)      |
| C2-C1-S1-C4    | -81.1(4)   | C2-C1-S1-Ni1   | 17.5(4)     |
| C5-C4-S1-C1    | 126.1(3)   | C3-C4-S1-C1    | -112.7(4)   |
| C5-C4-S1-Ni1   | 27.4(3)    | C3-C4-S1-Ni1   | 148.6(4)    |
| O1-Ni1-S1-C1   | 162.4(2)   | O2-Ni1-S1-C1   | -11.1(2)    |
| N1-Ni1-S1-C1   | -105.8(2)  | N2-Ni1-S1-C1   | 75(2)       |
| S2-Ni1-S1-C1   | 78.53(18)  | O1-Ni1-S1-C4   | -92.42(18)  |
| O2-Ni1-S1-C4   | 94.16(18)  | N1-Ni1-S1-C4   | -0.56(18)   |
| N2-Ni1-S1-C4   | -180(100)  | S2-Ni1-S1-C4   | -176.25(16) |
| C15-C14-S2-C12 | -82.4(4)   | C15-C14-S2-Ni1 | 15.6(4)     |
| C11-C12-S2-C14 | 69.4(4)    | C13-C12-S2-C14 | -56.9(4)    |
| C11-C12-S2-Ni1 | -27.7(3)   | C13-C12-S2-Ni1 | -154.0(4)   |
| O1-Ni1-S2-C14  | -12.30(19) | O2-Ni1-S2-C14  | 159.29(19)  |
| N1-Ni1-S2-C14  | 18.6(12)   | N2-Ni1-S2-C14  | -102.9(2)   |
| S1-Ni1-S2-C14  | 77.24(17)  | O1-Ni1-S2-C12  | 93.36(18)   |
| O2-Ni1-S2-C12  | -95.05(17) | N1-Ni1-S2-C12  | 124.3(12)   |
| N2-Ni1-S2-C12  | 2.77(18)   | S1-Ni1-S2-C12  | -177.10(16) |

Symmetry transformations used to generate equivalent atoms (if any):

Table 6. Anisotropic atomic displacement parameters ( $\text{\AA}^2$ ) for btw5.

The anisotropic atomic displacement factor exponent takes the form:  $-2\pi^2 [ h^2a^{*2} U_{11} + \dots + 2hka^* b^* U_{12} ]$

|     | $U_{11}$   | $U_{22}$   | $U_{33}$   | $U_{23}$    | $U_{13}$     | $U_{12}$     |
|-----|------------|------------|------------|-------------|--------------|--------------|
| C1  | 0.060(3)   | 0.060(3)   | 0.047(2)   | 0.004(2)    | -0.019(2)    | -0.029(2)    |
| C2  | 0.043(2)   | 0.046(2)   | 0.0350(19) | 0.0009(16)  | -0.0101(16)  | -0.0109(17)  |
| C3  | 0.051(3)   | 0.078(4)   | 0.086(4)   | 0.000(3)    | 0.003(3)     | -0.024(3)    |
| C4  | 0.044(2)   | 0.044(2)   | 0.055(3)   | 0.0046(19)  | -0.0108(19)  | -0.0053(18)  |
| C5  | 0.046(2)   | 0.044(2)   | 0.044(2)   | -0.0013(17) | -0.0061(18)  | -0.0059(18)  |
| C6  | 0.063(3)   | 0.034(2)   | 0.056(3)   | 0.0083(18)  | -0.016(2)    | -0.0033(19)  |
| C7  | 0.064(3)   | 0.047(2)   | 0.043(2)   | -0.0099(19) | -0.011(2)    | -0.013(2)    |
| C8  | 0.064(3)   | 0.050(2)   | 0.056(3)   | -0.011(2)   | -0.015(2)    | -0.023(2)    |
| C9  | 0.058(3)   | 0.057(3)   | 0.051(3)   | -0.005(2)   | -0.018(2)    | -0.023(2)    |
| C10 | 0.065(3)   | 0.061(3)   | 0.052(3)   | 0.014(2)    | -0.016(2)    | -0.031(2)    |
| C11 | 0.042(2)   | 0.060(3)   | 0.047(2)   | -0.001(2)   | -0.0119(18)  | -0.015(2)    |
| C12 | 0.045(2)   | 0.057(3)   | 0.041(2)   | -0.0005(19) | -0.0034(18)  | -0.011(2)    |
| C13 | 0.054(3)   | 0.070(3)   | 0.071(4)   | -0.003(3)   | -0.001(3)    | -0.003(3)    |
| C14 | 0.062(3)   | 0.040(2)   | 0.043(2)   | 0.0025(17)  | -0.011(2)    | -0.009(2)    |
| C15 | 0.042(2)   | 0.044(2)   | 0.037(2)   | 0.0057(16)  | -0.0084(16)  | -0.0075(17)  |
| C16 | 0.52(4)    | 0.110(10)  | 0.192(17)  | 0.027(11)   | -0.07(2)     | -0.155(18)   |
| O3  | 0.140(5)   | 0.092(4)   | 0.075(3)   | -0.008(3)   | 0.008(3)     | -0.035(4)    |
| O4  | 0.108(4)   | 0.214(8)   | 0.068(3)   | 0.021(4)    | -0.027(3)    | -0.070(5)    |
| C17 | 0.249(15)  | 0.313(18)  | 0.088(6)   | 0.052(9)    | -0.070(8)    | -0.234(15)   |
| I1  | 0.0684(2)  | 0.0667(2)  | 0.0634(2)  | 0.00471(16) | -0.02080(17) | -0.03390(18) |
| I3  | 0.0789(3)  | 0.0604(2)  | 0.0652(2)  | 0.00360(17) | -0.01951(19) | 0.00588(18)  |
| N1  | 0.0492(19) | 0.0367(16) | 0.0373(17) | 0.0020(13)  | -0.0123(15)  | -0.0090(14)  |
| N2  | 0.0480(19) | 0.0471(18) | 0.0367(17) | 0.0017(14)  | -0.0123(14)  | -0.0180(16)  |
| N3  | 0.076(3)   | 0.048(2)   | 0.041(2)   | 0.0094(17)  | -0.0100(19)  | 0.006(2)     |
| N4  | 0.060(3)   | 0.082(3)   | 0.055(2)   | 0.020(2)    | -0.030(2)    | -0.032(2)    |
| Ni1 | 0.0408(3)  | 0.0347(2)  | 0.0312(2)  | 0.00251(18) | -0.01086(19) | -0.0100(2)   |
| O1  | 0.0543(17) | 0.0395(14) | 0.0347(14) | 0.0014(11)  | -0.0120(12)  | -0.0060(13)  |
| O2  | 0.0475(16) | 0.0529(17) | 0.0386(15) | 0.0085(12)  | -0.0150(12)  | -0.0202(14)  |
| S1  | 0.0477(6)  | 0.0399(5)  | 0.0442(5)  | 0.0055(4)   | -0.0100(4)   | -0.0145(4)   |
| S2  | 0.0506(6)  | 0.0433(5)  | 0.0352(5)  | -0.0026(4)  | -0.0110(4)   | -0.0106(4)   |

Table 7. Hydrogen atom coordinates and isotropic atomic displacement parameters ( $\text{\AA}^2$ ) for btw5.

|      | x/a    | y/b     | z/c    | U     |
|------|--------|---------|--------|-------|
| H1A  | 1.0766 | 0.2906  | 0.3870 | 0.063 |
| H1B  | 0.9433 | 0.4069  | 0.4213 | 0.063 |
| H3C  | 1.2746 | 0.1772  | 0.0942 | 0.110 |
| H3D  | 1.2415 | 0.2992  | 0.1619 | 0.110 |
| H3E  | 1.1655 | 0.3063  | 0.0744 | 0.110 |
| H4   | 1.1300 | 0.1494  | 0.2399 | 0.059 |
| H5A  | 0.9832 | 0.2067  | 0.0846 | 0.056 |
| H5B  | 1.0873 | 0.0720  | 0.0988 | 0.056 |
| H6A  | 1.0229 | -0.0740 | 0.2143 | 0.080 |
| H6B  | 0.8892 | -0.0275 | 0.2967 | 0.080 |
| H6C  | 1.0138 | 0.0246  | 0.2964 | 0.080 |
| H7A  | 0.9101 | -0.0195 | 0.0879 | 0.062 |
| H7B  | 0.8190 | 0.1209  | 0.0730 | 0.062 |
| H8A  | 0.7299 | -0.0322 | 0.2240 | 0.066 |
| H8B  | 0.6943 | -0.0315 | 0.1197 | 0.066 |
| H9A  | 0.5756 | 0.1937  | 0.1445 | 0.064 |
| H9B  | 0.5049 | 0.1054  | 0.2129 | 0.064 |
| H10A | 0.5670 | 0.1807  | 0.4337 | 0.084 |
| H10B | 0.6508 | 0.0552  | 0.3702 | 0.084 |
| H10C | 0.4896 | 0.1062  | 0.3843 | 0.084 |
| H11A | 0.3792 | 0.2952  | 0.3148 | 0.059 |
| H11B | 0.4587 | 0.3643  | 0.2338 | 0.059 |
| H12  | 0.4447 | 0.3824  | 0.4370 | 0.059 |
| H13A | 0.3177 | 0.5746  | 0.3157 | 0.105 |
| H13B | 0.3182 | 0.6000  | 0.4259 | 0.105 |
| H13C | 0.2411 | 0.5070  | 0.4000 | 0.105 |
| H14A | 0.5093 | 0.6146  | 0.2413 | 0.060 |
| H14B | 0.6580 | 0.6202  | 0.2406 | 0.060 |
| H16A | 0.9306 | 0.3621  | 0.9054 | 0.394 |
| H16B | 0.9210 | 0.4265  | 0.8030 | 0.394 |
| H16C | 0.9229 | 0.2827  | 0.8163 | 0.394 |
| H3   | 0.7024 | 0.3487  | 0.8853 | 0.160 |
| H4O  | 0.7359 | 0.0948  | 0.7156 | 0.187 |
| H17A | 0.5663 | 0.1026  | 0.6709 | 0.267 |
| H17B | 0.6611 | -0.0111 | 0.5986 | 0.267 |
| H17C | 0.6380 | 0.1319  | 0.5656 | 0.267 |
| H3A  | 0.6670 | 0.5007  | 0.0093 | 0.074 |
| H3B  | 0.5919 | 0.6229  | 0.0671 | 0.074 |
| H4A  | 0.9013 | 0.1363  | 0.5542 | 0.073 |
| H4B  | 1.0073 | 0.2047  | 0.5400 | 0.073 |

### Supplementary Information 4

Table 1. Crystal data and structure refinement for Complex BC39 (**Complex 6**).

|                                   |                                                                                                                    |
|-----------------------------------|--------------------------------------------------------------------------------------------------------------------|
| Identification code               | Complex BC39                                                                                                       |
| Empirical formula                 | C13 H28 I2 N4 Ni O2 S2                                                                                             |
| Formula weight                    | 649.02                                                                                                             |
| Temperature                       | 293(2) K                                                                                                           |
| Wavelength                        | 0.71073 Å                                                                                                          |
| Crystal system, space group       | Monoclinic, P2(1)/n                                                                                                |
| Crystal size                      | 0.15 x 0.15 x 0.05 mm                                                                                              |
| Unit cell dimensions              | a = 11.2811(9)Å    alpha = 90deg.<br>b = 12.8465(8)Å    beta = 83.251(4)deg.<br>c = 15.4674(13)Å    gamma = 90deg. |
| Volume                            | 2226.0(3) Å <sup>3</sup>                                                                                           |
| Z, Calculated density             | 4, 1.937 Mg/m <sup>3</sup>                                                                                         |
| Absorption coefficient            | 3.846 mm <sup>-1</sup>                                                                                             |
| F(000)                            | 1264                                                                                                               |
| Theta range for data collection   | 2.07 to 23.36 deg.                                                                                                 |
| Limiting indices                  | 0<=h<=12, -13<=k<=13, -16<=l<=17                                                                                   |
| Reflections collected / unique    | 5962 / 3113 [R(int) = 0.1168]                                                                                      |
| Completeness to theta = 23.36     | 96.0 %                                                                                                             |
| Reflections with I>2sigma(I)      | 2038                                                                                                               |
| Max. and min. transmission        | 0.8309 and 0.5962                                                                                                  |
| Data / restraints / parameters    | 3113 / 0 / 217                                                                                                     |
| Goodness-of-fit on F <sup>2</sup> | 1.089                                                                                                              |
| Final R indices [I>2sigma(I)]     | R1 = 0.0641, wR2 = 0.1383                                                                                          |
| R indices (all data)              | R1 = 0.1071, wR2 = 0.1548                                                                                          |
| Largest diff. peak and hole       | 0.925 and -0.806 e.Å <sup>-3</sup>                                                                                 |

Table 2. Atomic coordinates ( $\times 10^4$ ) and equivalent isotropic displacement parameters ( $\text{\AA}^2 \times 10^3$ ) for Complex BC39.  $U(\text{eq})$  is defined as one third of the trace of the orthogonalized  $U_{ij}$  tensor.

|        | x          | y         | z         | $U(\text{eq})$ |
|--------|------------|-----------|-----------|----------------|
| Ni     | 7554 (1)   | 2998 (1)  | 1017 (1)  | 39 (1)         |
| S (1)  | 8950 (3)   | 2128 (2)  | 1834 (2)  | 51 (1)         |
| S (2)  | 7018 (3)   | 4372 (2)  | 2087 (2)  | 50 (1)         |
| O (1)  | 9096 (7)   | 3938 (6)  | 668 (6)   | 50 (2)         |
| O (2)  | 6728 (8)   | 3940 (6)  | 215 (5)   | 45 (2)         |
| N (1)  | 8047 (10)  | 1938 (7)  | 6 (7)     | 52 (3)         |
| N (2)  | 5913 (9)   | 2284 (7)  | 1491 (7)  | 49 (3)         |
| N (3)  | 10705 (11) | 4712 (9)  | 1071 (8)  | 73 (4)         |
| N (4)  | 6487 (10)  | 5561 (8)  | -197 (7)  | 57 (3)         |
| C (1)  | 9891 (12)  | 3968 (10) | 1172 (9)  | 54 (3)         |
| C (2)  | 9916 (12)  | 3219 (10) | 1897 (9)  | 61 (4)         |
| C (3)  | 9673 (13)  | 1426 (12) | 899 (9)   | 69 (4)         |
| C (4)  | 8750 (16)  | 1104 (11) | 322 (11)  | 86 (5)         |
| C (5)  | 8770 (15)  | 2477 (12) | -722 (10) | 83 (5)         |
| C (6)  | 6996 (17)  | 1514 (12) | -402 (11) | 86 (5)         |
| C (7)  | 5979 (14)  | 1034 (12) | 202 (10)  | 72 (4)         |
| C (8)  | 5316 (12)  | 1849 (11) | 772 (10)  | 65 (4)         |
| C (9)  | 6051 (13)  | 1442 (11) | 2129 (10) | 72 (4)         |
| C (10) | 5091 (11)  | 3101 (10) | 1898 (9)  | 58 (4)         |
| C (11) | 5663 (12)  | 3771 (11) | 2541 (8)  | 56 (4)         |
| C (12) | 6516 (14)  | 5282 (8)  | 1309 (8)  | 62 (4)         |
| C (13) | 6568 (11)  | 4870 (9)  | 407 (7)   | 41 (3)         |
| I (1)  | 12873 (1)  | 5544 (1)  | 2437 (1)  | 68 (1)         |
| I (2)  | 7275 (1)   | 8090 (1)  | 733 (1)   | 66 (1)         |

Table 3. Bond lengths [Å] and angles [deg] for Complex BC39.

---

|                  |           |
|------------------|-----------|
| Ni-O(2)          | 2.035(8)  |
| Ni-N(1)          | 2.098(10) |
| Ni-N(2)          | 2.118(10) |
| Ni-O(1)          | 2.134(8)  |
| Ni-S(1)          | 2.407(4)  |
| Ni-S(2)          | 2.446(3)  |
| S(1)-C(2)        | 1.785(13) |
| S(1)-C(3)        | 1.815(14) |
| S(2)-C(11)       | 1.781(14) |
| S(2)-C(12)       | 1.815(12) |
| O(1)-C(1)        | 1.256(15) |
| O(2)-C(13)       | 1.238(13) |
| N(1)-C(4)        | 1.451(17) |
| N(1)-C(5)        | 1.482(17) |
| N(1)-C(6)        | 1.509(19) |
| N(2)-C(8)        | 1.476(16) |
| N(2)-C(9)        | 1.485(15) |
| N(2)-C(10)       | 1.491(15) |
| N(3)-C(1)        | 1.321(16) |
| N(4)-C(13)       | 1.300(14) |
| C(1)-C(2)        | 1.482(18) |
| C(3)-C(4)        | 1.51(2)   |
| C(6)-C(7)        | 1.52(2)   |
| C(7)-C(8)        | 1.508(19) |
| C(10)-C(11)      | 1.516(18) |
| C(12)-C(13)      | 1.487(17) |
| O(2)-Ni-N(1)     | 91.9(4)   |
| O(2)-Ni-N(2)     | 91.4(4)   |
| N(1)-Ni-N(2)     | 97.0(4)   |
| O(2)-Ni-O(1)     | 85.8(3)   |
| N(1)-Ni-O(1)     | 92.4(4)   |
| N(2)-Ni-O(1)     | 170.3(4)  |
| O(2)-Ni-S(1)     | 166.1(3)  |
| N(1)-Ni-S(1)     | 87.6(3)   |
| N(2)-Ni-S(1)     | 102.5(3)  |
| O(1)-Ni-S(1)     | 80.3(3)   |
| O(2)-Ni-S(2)     | 83.6(2)   |
| N(1)-Ni-S(2)     | 174.3(3)  |
| N(2)-Ni-S(2)     | 86.7(3)   |
| O(1)-Ni-S(2)     | 83.8(2)   |
| S(1)-Ni-S(2)     | 96.00(12) |
| C(2)-S(1)-C(3)   | 102.3(7)  |
| C(2)-S(1)-Ni     | 96.0(4)   |
| C(3)-S(1)-Ni     | 94.2(5)   |
| C(11)-S(2)-C(12) | 102.7(7)  |
| C(11)-S(2)-Ni    | 95.0(5)   |
| C(12)-S(2)-Ni    | 95.0(4)   |
| C(1)-O(1)-Ni     | 118.8(8)  |
| C(13)-O(2)-Ni    | 119.5(8)  |
| C(4)-N(1)-C(5)   | 109.1(12) |
| C(4)-N(1)-C(6)   | 111.2(11) |
| C(5)-N(1)-C(6)   | 103.9(12) |
| C(4)-N(1)-Ni     | 109.6(9)  |
| C(5)-N(1)-Ni     | 109.7(8)  |
| C(6)-N(1)-Ni     | 113.2(9)  |
| C(8)-N(2)-C(9)   | 108.5(11) |

|                  |           |
|------------------|-----------|
| C(8)-N(2)-C(10)  | 105.6(10) |
| C(9)-N(2)-C(10)  | 109.9(10) |
| C(8)-N(2)-Ni     | 111.2(8)  |
| C(9)-N(2)-Ni     | 113.0(8)  |
| C(10)-N(2)-Ni    | 108.5(7)  |
| O(1)-C(1)-N(3)   | 119.1(13) |
| O(1)-C(1)-C(2)   | 121.8(12) |
| N(3)-C(1)-C(2)   | 119.0(13) |
| C(1)-C(2)-S(1)   | 113.8(10) |
| C(4)-C(3)-S(1)   | 109.3(10) |
| N(1)-C(4)-C(3)   | 116.1(12) |
| N(1)-C(6)-C(7)   | 117.5(13) |
| C(8)-C(7)-C(6)   | 111.3(12) |
| N(2)-C(8)-C(7)   | 117.7(11) |
| N(2)-C(10)-C(11) | 112.7(11) |
| C(10)-C(11)-S(2) | 113.5(9)  |
| C(13)-C(12)-S(2) | 114.3(8)  |
| O(2)-C(13)-N(4)  | 120.5(11) |
| O(2)-C(13)-C(12) | 123.8(11) |
| N(4)-C(13)-C(12) | 115.6(10) |

---



Table 4. Anisotropic displacement parameters ( $\text{Å}^2 \times 10^3$ ) for Complex BC39. The anisotropic displacement factor exponent takes the form:  
 $-2 \pi^2 [ h^2 a^{*2} U_{11} + \dots + 2 h k a^* b^* U_{12} ]$

|        | U11      | U22     | U33     | U23     | U13      | U12     |
|--------|----------|---------|---------|---------|----------|---------|
| Ni     | 39 (1)   | 32 (1)  | 45 (1)  | 1 (1)   | -2 (1)   | -1 (1)  |
| S (1)  | 50 (2)   | 50 (2)  | 53 (2)  | 10 (2)  | -1 (2)   | 5 (2)   |
| S (2)  | 59 (2)   | 47 (2)  | 43 (2)  | -2 (2)  | -5 (2)   | 2 (2)   |
| O (1)  | 43 (6)   | 49 (5)  | 58 (6)  | 6 (4)   | -1 (5)   | -14 (4) |
| O (2)  | 59 (6)   | 32 (5)  | 44 (5)  | 5 (4)   | -10 (4)  | 1 (4)   |
| N (1)  | 60 (7)   | 42 (6)  | 55 (7)  | -8 (5)  | -8 (6)   | 8 (5)   |
| N (2)  | 49 (7)   | 45 (6)  | 54 (7)  | 14 (5)  | -7 (5)   | -3 (5)  |
| N (3)  | 79 (9)   | 70 (8)  | 72 (9)  | 10 (7)  | -22 (7)  | -29 (7) |
| N (4)  | 86 (9)   | 44 (6)  | 41 (6)  | 1 (5)   | -3 (6)   | 11 (6)  |
| C (1)  | 43 (9)   | 54 (8)  | 66 (10) | -7 (7)  | -6 (7)   | -2 (7)  |
| C (2)  | 43 (8)   | 76 (9)  | 64 (9)  | 5 (8)   | -11 (7)  | -6 (7)  |
| C (3)  | 56 (10)  | 76 (10) | 73 (11) | 1 (8)   | -3 (8)   | 33 (8)  |
| C (4)  | 98 (14)  | 66 (10) | 92 (13) | -21 (9) | -7 (10)  | 48 (10) |
| C (5)  | 107 (14) | 76 (10) | 61 (10) | 4 (8)   | 16 (9)   | 8 (10)  |
| C (6)  | 118 (15) | 63 (9)  | 78 (12) | -22 (9) | -18 (11) | 7 (10)  |
| C (7)  | 74 (11)  | 65 (9)  | 78 (11) | -20 (8) | -15 (9)  | -23 (9) |
| C (8)  | 44 (9)   | 69 (9)  | 83 (11) | 9 (8)   | -19 (8)  | -26 (7) |
| C (9)  | 65 (10)  | 68 (9)  | 81 (11) | 32 (8)  | -1 (8)   | -2 (8)  |
| C (10) | 36 (8)   | 71 (9)  | 65 (9)  | 26 (8)  | 7 (6)    | -6 (7)  |
| C (11) | 59 (9)   | 74 (9)  | 35 (7)  | 9 (7)   | -5 (6)   | 4 (7)   |
| C (12) | 102 (12) | 24 (6)  | 56 (9)  | 0 (6)   | 2 (8)    | 16 (7)  |
| C (13) | 52 (8)   | 36 (7)  | 33 (7)  | 1 (6)   | 0 (6)    | -1 (6)  |
| I (1)  | 62 (1)   | 82 (1)  | 60 (1)  | -6 (1)  | -12 (1)  | 11 (1)  |
| I (2)  | 79 (1)   | 50 (1)  | 71 (1)  | 6 (1)   | -19 (1)  | -11 (1) |

Table 5. Hydrogen coordinates ( $\times 10^4$ ) and isotropic displacement parameters ( $\text{\AA}^2 \times 10^3$ ) for Complex BC39.

|        | x     | y    | z     | U(iso) |
|--------|-------|------|-------|--------|
| H(3A)  | 10686 | 5167 | 665   | 87     |
| H(3B)  | 11255 | 4741 | 1412  | 87     |
| H(4A)  | 6543  | 5374 | -734  | 68     |
| H(4B)  | 6376  | 6205 | -59   | 68     |
| H(2A)  | 9689  | 3579 | 2443  | 73     |
| H(2B)  | 10726 | 2969 | 1902  | 73     |
| H(3C)  | 10268 | 1866 | 577   | 82     |
| H(3D)  | 10073 | 814  | 1093  | 82     |
| H(4C)  | 9152  | 737  | -177  | 103    |
| H(4D)  | 8208  | 615  | 642   | 103    |
| H(5A)  | 8312  | 3033 | -930  | 125    |
| H(5B)  | 8988  | 1991 | -1185 | 125    |
| H(5C)  | 9479  | 2755 | -521  | 125    |
| H(6A)  | 7292  | 990  | -825  | 103    |
| H(6B)  | 6669  | 2076 | -720  | 103    |
| H(7A)  | 5429  | 691  | -142  | 86     |
| H(7B)  | 6297  | 513  | 566   | 86     |
| H(8A)  | 5131  | 2421 | 401   | 78     |
| H(8B)  | 4563  | 1549 | 1021  | 78     |
| H(9A)  | 6441  | 1713 | 2600  | 108    |
| H(9B)  | 6522  | 889  | 1847  | 108    |
| H(9C)  | 5278  | 1179 | 2351  | 108    |
| H(10A) | 4385  | 2769 | 2196  | 70     |
| H(10B) | 4838  | 3542 | 1444  | 70     |
| H(11A) | 5823  | 3343 | 3030  | 67     |
| H(11B) | 5103  | 4309 | 2760  | 67     |
| H(12A) | 5700  | 5481 | 1506  | 74     |
| H(12B) | 7004  | 5905 | 1300  | 74     |

### **Supplementary Information 5**

Table 1. Crystal data and structure refinement for btw17o (**Complex 8**).

|                                   |                                                                                                              |
|-----------------------------------|--------------------------------------------------------------------------------------------------------------|
| Identification code               | btw17o                                                                                                       |
| Empirical formula                 | C10 H19 N2 Ni O12                                                                                            |
| Formula weight                    | 417.96                                                                                                       |
| Temperature                       | 298(2) K                                                                                                     |
| Wavelength                        | 0.71073 Å                                                                                                    |
| Crystal system, space group       | Orthorhombic, Pna2(1)                                                                                        |
| Unit cell dimensions              | a = 14.669(5) Å    alpha = 90 deg.<br>b = 16.306(5) Å    beta = 90 deg.<br>c = 7.034(2) Å    gamma = 90 deg. |
| Volume                            | 1682.5(9) Å <sup>3</sup>                                                                                     |
| Z, Calculated density             | 4, 1.626 Mg/m <sup>3</sup>                                                                                   |
| Absorption coefficient            | 1.218 mm <sup>-1</sup>                                                                                       |
| F(000)                            | 844                                                                                                          |
| Crystal size                      | 0.30 x 0.02 x 0.02 mm                                                                                        |
| Theta range for data collection   | 1.87 to 28.36 deg.                                                                                           |
| Limiting indices                  | -19<=h<=18, -21<=k<=19, -9<=l<=7                                                                             |
| Reflections collected / unique    | 11122 / 3752 [R(int) = 0.0289]                                                                               |
| Completeness to theta = 28.36     | 99.6 %                                                                                                       |
| Absorption correction             | Empirical                                                                                                    |
| Max. and min. transmission        | 0.9761 and 0.7114                                                                                            |
| Refinement method                 | Full-matrix least-squares on F <sup>2</sup>                                                                  |
| Data / restraints / parameters    | 3752 / 1 / 227                                                                                               |
| Goodness-of-fit on F <sup>2</sup> | 1.064                                                                                                        |
| Final R indices [I>2sigma(I)]     | R1 = 0.0368, wR2 = 0.0941                                                                                    |
| R indices (all data)              | R1 = 0.0409, wR2 = 0.0959                                                                                    |
| Absolute structure parameter      | 0.047(16)                                                                                                    |
| Largest diff. peak and hole       | 0.497 and -0.294 e.Å <sup>-3</sup>                                                                           |

Table 2. Atomic coordinates ( $\times 10^4$ ) and equivalent isotropic displacement parameters ( $\text{\AA}^2 \times 10^3$ ) for btw17o.  $U(\text{eq})$  is defined as one third of the trace of the orthogonalized  $U_{ij}$  tensor.

|       | x        | y        | z        | $U(\text{eq})$ |
|-------|----------|----------|----------|----------------|
| C(1)  | 1530 (2) | 7893 (2) | 2035 (5) | 27 (1)         |
| C(2)  | 622 (2)  | 8012 (2) | 3062 (5) | 23 (1)         |
| C(3)  | 225 (2)  | 6188 (2) | 7393 (5) | 23 (1)         |
| C(4)  | 315 (2)  | 5846 (2) | 5376 (4) | 24 (1)         |
| C(5)  | 2742 (2) | 5714 (2) | 6377 (5) | 26 (1)         |
| C(6)  | 1890 (2) | 5351 (2) | 5496 (6) | 27 (1)         |
| C(7)  | 2212 (2) | 6513 (2) | 2117 (5) | 24 (1)         |
| C(8)  | 1352 (2) | 6038 (2) | 2599 (5) | 25 (1)         |
| C(9)  | 3088 (2) | 7720 (2) | 3160 (5) | 25 (1)         |
| C(10) | 3512 (2) | 7971 (2) | 1289 (5) | 22 (1)         |
| N(1)  | 1262 (2) | 5964 (1) | 4700 (4) | 20 (1)         |
| N(2)  | 2187 (2) | 7341 (2) | 3014 (4) | 20 (1)         |
| Ni(1) | 1636 (1) | 7098 (1) | 5767 (1) | 19 (1)         |
| O(1)  | 537 (2)  | 7720 (1) | 4721 (4) | 27 (1)         |
| O(2)  | 30 (2)   | 8405 (1) | 2186 (4) | 33 (1)         |
| O(3)  | 784 (2)  | 6704 (1) | 7971 (3) | 28 (1)         |
| O(4)  | -447 (2) | 5926 (1) | 8313 (4) | 34 (1)         |
| O(5)  | 3365 (2) | 5225 (2) | 6828 (5) | 42 (1)         |
| O(6)  | 2771 (1) | 6478 (1) | 6647 (4) | 28 (1)         |
| O(7)  | 4157 (2) | 8512 (1) | 1472 (4) | 31 (1)         |
| O(8)  | 3271 (2) | 7689 (2) | -242 (4) | 34 (1)         |
| O(9)  | 2029 (2) | 8138 (1) | 7145 (4) | 35 (1)         |
| O(10) | 9678 (2) | 8442 (2) | 8130 (5) | 52 (1)         |
| O(11) | 9443 (2) | 9932 (2) | 3448 (5) | 54 (1)         |
| O(12) | 1821 (2) | 9626 (2) | 5606 (7) | 63 (1)         |

Table 3. Bond lengths [Å] and angles [deg] for btw17o.

---

|                  |          |
|------------------|----------|
| C(1)-N(2)        | 1.487(4) |
| C(1)-C(2)        | 1.527(4) |
| C(1)-H(1A)       | 0.9700   |
| C(1)-H(1B)       | 0.9700   |
| C(2)-O(2)        | 1.243(4) |
| C(2)-O(1)        | 1.267(4) |
| C(3)-O(3)        | 1.244(4) |
| C(3)-O(4)        | 1.254(4) |
| C(3)-C(4)        | 1.530(4) |
| C(4)-N(1)        | 1.481(4) |
| C(4)-H(4A)       | 0.9700   |
| C(4)-H(4B)       | 0.9700   |
| C(5)-O(5)        | 1.253(4) |
| C(5)-O(6)        | 1.259(4) |
| C(5)-C(6)        | 1.516(4) |
| C(6)-N(1)        | 1.471(4) |
| C(6)-H(6A)       | 0.9700   |
| C(6)-H(6B)       | 0.9700   |
| C(7)-N(2)        | 1.491(4) |
| C(7)-C(8)        | 1.518(4) |
| C(7)-H(7A)       | 0.9700   |
| C(7)-H(7B)       | 0.9700   |
| C(8)-N(1)        | 1.489(4) |
| C(8)-H(8A)       | 0.9700   |
| C(8)-H(8B)       | 0.9700   |
| C(9)-N(2)        | 1.463(4) |
| C(9)-C(10)       | 1.512(5) |
| C(9)-H(9A)       | 0.9700   |
| C(9)-H(9B)       | 0.9700   |
| C(10)-O(8)       | 1.223(4) |
| C(10)-O(7)       | 1.301(4) |
| N(1)-Ni(1)       | 2.069(2) |
| N(2)-Ni(1)       | 2.135(3) |
| Ni(1)-O(9)       | 2.036(2) |
| Ni(1)-O(1)       | 2.041(2) |
| Ni(1)-O(6)       | 2.044(2) |
| Ni(1)-O(3)       | 2.093(2) |
| O(7)-H(7)        | 0.8200   |
|                  |          |
| N(2)-C(1)-C(2)   | 115.0(3) |
| N(2)-C(1)-H(1A)  | 108.5    |
| C(2)-C(1)-H(1A)  | 108.5    |
| N(2)-C(1)-H(1B)  | 108.5    |
| C(2)-C(1)-H(1B)  | 108.5    |
| H(1A)-C(1)-H(1B) | 107.5    |
| O(2)-C(2)-O(1)   | 125.6(3) |
| O(2)-C(2)-C(1)   | 116.1(3) |
| O(1)-C(2)-C(1)   | 118.3(3) |
| O(3)-C(3)-O(4)   | 125.5(3) |
| O(3)-C(3)-C(4)   | 119.5(3) |
| O(4)-C(3)-C(4)   | 115.0(3) |
| N(1)-C(4)-C(3)   | 109.4(2) |
| N(1)-C(4)-H(4A)  | 109.8    |
| C(3)-C(4)-H(4A)  | 109.8    |

|                      |            |
|----------------------|------------|
| N(1) - C(4) - H(4B)  | 109.8      |
| C(3) - C(4) - H(4B)  | 109.8      |
| H(4A) - C(4) - H(4B) | 108.2      |
| O(5) - C(5) - O(6)   | 124.5(3)   |
| O(5) - C(5) - C(6)   | 117.1(3)   |
| O(6) - C(5) - C(6)   | 118.4(3)   |
| N(1) - C(6) - C(5)   | 114.0(2)   |
| N(1) - C(6) - H(6A)  | 108.8      |
| C(5) - C(6) - H(6A)  | 108.8      |
| N(1) - C(6) - H(6B)  | 108.8      |
| C(5) - C(6) - H(6B)  | 108.8      |
| H(6A) - C(6) - H(6B) | 107.7      |
| N(2) - C(7) - C(8)   | 110.3(2)   |
| N(2) - C(7) - H(7A)  | 109.6      |
| C(8) - C(7) - H(7A)  | 109.6      |
| N(2) - C(7) - H(7B)  | 109.6      |
| C(8) - C(7) - H(7B)  | 109.6      |
| H(7A) - C(7) - H(7B) | 108.1      |
| N(1) - C(8) - C(7)   | 109.7(3)   |
| N(1) - C(8) - H(8A)  | 109.7      |
| C(7) - C(8) - H(8A)  | 109.7      |
| N(1) - C(8) - H(8B)  | 109.7      |
| C(7) - C(8) - H(8B)  | 109.7      |
| H(8A) - C(8) - H(8B) | 108.2      |
| N(2) - C(9) - C(10)  | 115.1(3)   |
| N(2) - C(9) - H(9A)  | 108.5      |
| C(10) - C(9) - H(9A) | 108.5      |
| N(2) - C(9) - H(9B)  | 108.5      |
| C(10) - C(9) - H(9B) | 108.5      |
| H(9A) - C(9) - H(9B) | 107.5      |
| O(8) - C(10) - O(7)  | 123.5(3)   |
| O(8) - C(10) - C(9)  | 123.1(3)   |
| O(7) - C(10) - C(9)  | 113.4(3)   |
| C(6) - N(1) - C(4)   | 112.1(2)   |
| C(6) - N(1) - C(8)   | 112.1(3)   |
| C(4) - N(1) - C(8)   | 114.4(2)   |
| C(6) - N(1) - Ni(1)  | 107.65(18) |
| C(4) - N(1) - Ni(1)  | 104.42(17) |
| C(8) - N(1) - Ni(1)  | 105.33(17) |
| C(9) - N(2) - C(1)   | 111.3(2)   |
| C(9) - N(2) - C(7)   | 112.9(2)   |
| C(1) - N(2) - C(7)   | 111.6(2)   |
| C(9) - N(2) - Ni(1)  | 110.9(2)   |
| C(1) - N(2) - Ni(1)  | 106.69(19) |
| C(7) - N(2) - Ni(1)  | 102.99(18) |
| O(9) - Ni(1) - O(1)  | 88.96(10)  |
| O(9) - Ni(1) - O(6)  | 92.16(10)  |
| O(1) - Ni(1) - O(6)  | 176.41(10) |
| O(9) - Ni(1) - N(1)  | 172.54(11) |
| O(1) - Ni(1) - N(1)  | 95.93(10)  |
| O(6) - Ni(1) - N(1)  | 83.31(9)   |
| O(9) - Ni(1) - O(3)  | 94.12(10)  |
| O(1) - Ni(1) - O(3)  | 87.03(9)   |
| O(6) - Ni(1) - O(3)  | 96.29(10)  |
| N(1) - Ni(1) - O(3)  | 80.54(9)   |
| O(9) - Ni(1) - N(2)  | 99.81(10)  |
| O(1) - Ni(1) - N(2)  | 83.08(10)  |
| O(6) - Ni(1) - N(2)  | 93.37(10)  |

|                 |           |
|-----------------|-----------|
| N(1)-Ni(1)-N(2) | 86.41(10) |
| O(3)-Ni(1)-N(2) | 162.72(9) |
| C(2)-O(1)-Ni(1) | 116.2(2)  |
| C(3)-O(3)-Ni(1) | 111.1(2)  |
| C(5)-O(6)-Ni(1) | 114.6(2)  |
| C(10)-O(7)-H(7) | 109.5     |

---

Table 4. Anisotropic displacement parameters ( $\text{Å}^2 \times 10^3$ ) for btw17o. The anisotropic displacement factor exponent takes the form:  
 $-2 \pi^2 [ h^2 a^{*2} U_{11} + \dots + 2 h k a^* b^* U_{12} ]$

|       | U11   | U22   | U33   | U23   | U13   | U12    |
|-------|-------|-------|-------|-------|-------|--------|
| C(1)  | 25(2) | 34(2) | 21(2) | 5(1)  | 2(1)  | 6(1)   |
| C(2)  | 25(2) | 22(1) | 23(2) | -3(1) | 1(1)  | 0(1)   |
| C(3)  | 25(2) | 22(1) | 22(2) | 2(1)  | 4(1)  | 3(1)   |
| C(4)  | 20(1) | 26(1) | 25(2) | -4(1) | 2(1)  | -4(1)  |
| C(5)  | 25(2) | 32(2) | 23(2) | 4(1)  | 2(1)  | 1(1)   |
| C(6)  | 29(1) | 19(1) | 33(2) | 0(1)  | -2(2) | 2(1)   |
| C(7)  | 23(2) | 26(1) | 22(2) | -3(1) | 3(1)  | 0(1)   |
| C(8)  | 27(2) | 29(2) | 19(2) | -6(1) | 3(1)  | -2(1)  |
| C(9)  | 21(1) | 35(2) | 18(2) | 0(1)  | -1(1) | -6(1)  |
| C(10) | 19(1) | 27(2) | 20(2) | 3(1)  | 0(1)  | 3(1)   |
| N(1)  | 19(1) | 21(1) | 21(1) | -1(1) | 1(1)  | -1(1)  |
| N(2)  | 18(1) | 24(1) | 17(1) | -2(1) | 0(1)  | 0(1)   |
| Ni(1) | 22(1) | 20(1) | 16(1) | -1(1) | 0(1)  | -1(1)  |
| O(1)  | 26(1) | 32(1) | 23(1) | 1(1)  | 3(1)  | 6(1)   |
| O(2)  | 28(1) | 41(1) | 31(1) | 3(1)  | -4(1) | 10(1)  |
| O(3)  | 35(1) | 28(1) | 21(1) | -2(1) | 4(1)  | -4(1)  |
| O(4)  | 36(1) | 35(1) | 30(1) | -4(1) | 14(1) | -8(1)  |
| O(5)  | 32(1) | 44(1) | 49(2) | 6(1)  | -8(1) | 14(1)  |
| O(6)  | 27(1) | 27(1) | 30(1) | 0(1)  | -8(1) | 0(1)   |
| O(7)  | 32(1) | 37(1) | 23(1) | 2(1)  | 2(1)  | -12(1) |
| O(8)  | 35(1) | 46(2) | 20(1) | -6(1) | -1(1) | -13(1) |
| O(9)  | 51(2) | 27(1) | 28(1) | -6(1) | -6(1) | -6(1)  |
| O(10) | 51(2) | 52(2) | 52(2) | 1(2)  | 3(2)  | 2(1)   |
| O(11) | 61(2) | 43(2) | 59(2) | 1(1)  | 14(2) | 2(1)   |
| O(12) | 85(2) | 42(1) | 63(2) | 12(2) | -4(2) | 6(1)   |



## **Supplementary Information 6**

### **Crystal Structure Information for bsc1o (Complex 10).**

A brown plate shaped crystal of bsc1 (C<sub>10</sub> H<sub>22</sub> N<sub>2</sub> Ni S<sub>2</sub>) with approximate dimensions 0.01 x 0.12 x 0.22 mm, was used for the X-ray crystallographic analysis. The X-ray intensity data were measured at 298(2) K, on a Bruker SMART APEX CCD area detector system equipped with a graphite monochromator and a MoK $\alpha$  fine-focus sealed tube ( $\lambda = 0.71073\text{\AA}$ ) operated at 1600 watts power (50 kV, 32 mA). The detector was placed at a distance of 5.8 cm from the crystal.

A total of 1850 frames were collected with a scan width of  $0.3^\circ$  in  $\omega$  and an exposure time of 10 seconds/frame. The total data collection time was about 8 hours. The frames were integrated with the Bruker SAINT software package using a narrow-frame integration algorithm. The integration of the data using a Orthorhombic unit cell yielded a total of 6619 reflections to a maximum  $\theta$  angle of  $28.23^\circ$  ( $0.90\text{\AA}$  resolution), of which 1650 were independent, completeness = 98.3%,  $R_{\text{int}} = 0.0863$ ,  $R_{\text{sig}} = 0.0777$  and 1146 were greater than  $2\sigma(I)$ . The final cell constants:  $a = 9.487(6)\text{\AA}$ ,  $b = 7.862(5)\text{\AA}$ ,  $c = 18.145(13)\text{\AA}$ ,  $\alpha = 90^\circ$ ,  $\beta = 90^\circ$ ,  $\gamma = 90^\circ$ , volume =  $1353.4(16)\text{\AA}^3$ , are based upon the refinement of the XYZ-centroids of 915 reflections above  $20\sigma(I)$  with  $2.248^\circ < \theta < 24.842^\circ$ . Analysis of the data showed negligible decay during data collection. Data were corrected for absorption effects using the multiscan technique (SADABS). The ratio of minimum to maximum apparent transmission was 0.3458.

The structure was solved and refined using the Bruker SHELXTL (Version 6.1) Software Package, using the space group Pbcn, with  $Z = 4$  for the formula unit, C<sub>10</sub> H<sub>22</sub> N<sub>2</sub> Ni S<sub>2</sub>. The final anisotropic full-matrix least-squares refinement on  $F^2$  with 71 variables converged at  $R1 = 6.32\%$ , for the observed data and  $wR2 = 16.41\%$  for all data. The goodness-of-fit was 0.966. The largest peak on the final difference map was  $0.802\text{ e}^-/\text{\AA}^3$  and the largest hole was  $-0.663\text{ e}^-/\text{\AA}^3$ . Based on the final model, the calculated density of the crystal is  $1.439\text{ g/cm}^3$  and  $F(000)$  amounts to 624 electrons.

**Table 1. Sample and crystal data for bsc1.**

---

|                                 |                                                             |                     |
|---------------------------------|-------------------------------------------------------------|---------------------|
| Identification code             | bsc1                                                        |                     |
| Empirical formula               | C10 H22 N2 Ni S2                                            |                     |
| Formula weight                  | 293.13                                                      |                     |
| Temperature                     | 298(2) K                                                    |                     |
| Wavelength                      | 0.71073 Å                                                   |                     |
| Crystal size                    | 0.22 x 0.12 x 0.01 mm                                       |                     |
| Crystal habit                   | red-brown plate                                             |                     |
| Crystal system                  | Orthorhombic                                                |                     |
| Space group                     | Pbcn                                                        |                     |
| Unit cell dimensions            | a = 9.487(6) Å                                              | $\alpha = 90^\circ$ |
|                                 | b = 7.862(5) Å                                              | $\beta = 90^\circ$  |
|                                 | c = 18.145(13) Å                                            | $\gamma = 90^\circ$ |
| Volume                          | 1353.4(16) Å <sup>3</sup>                                   |                     |
| Z                               | 4                                                           |                     |
| Density (calculated)            | 1.439 g/cm <sup>3</sup>                                     |                     |
| Absorption coefficient          | 1.715 mm <sup>-1</sup>                                      |                     |
| F(000)                          | 624                                                         |                     |
|                                 |                                                             |                     |
| Diffractionmeter                | CCD area detector                                           |                     |
| Radiation source                | fine-focus sealed tube, MoK $\alpha$                        |                     |
| Generator power                 | 1600 watts (50 kV, 32mA)                                    |                     |
| Detector distance               | 5.8 cm                                                      |                     |
| Data collection method          | phi and omega scans                                         |                     |
| Theta range for data collection | 2.24 to 28.23°                                              |                     |
| Index ranges                    | $-12 \leq h \leq 12, -9 \leq k \leq 10, -13 \leq l \leq 24$ |                     |

---

**Table 2. Atomic coordinates and equivalent isotropic atomic displacement parameters ( $\text{\AA}^2$ ) for bsc1.**

U(eq) is defined as one third of the trace of the orthogonalized  $U_{ij}$  tensor.

|     | x           | y           | z          | U(eq)      |
|-----|-------------|-------------|------------|------------|
| C1  | 0.4353(5)   | 0.0965(6)   | 0.3899(3)  | 0.0399(12) |
| C2  | 0.4636(5)   | 0.2754(6)   | 0.4163(3)  | 0.0407(12) |
| C3  | 0.3566(7)   | 0.3271(7)   | 0.4744(3)  | 0.0610(16) |
| C4  | 0.6738(5)   | 0.0462(6)   | 0.3420(3)  | 0.0447(13) |
| C5  | 0.4748(5)   | -0.1078(6)  | 0.2895(3)  | 0.0451(13) |
| N1  | 0.5200(4)   | 0.0548(5)   | 0.3232(2)  | 0.0340(9)  |
| Ni1 | 0.5000      | 0.23289(9)  | 0.2500     | 0.0262(3)  |
| S1  | 0.54055(13) | 0.41707(15) | 0.16365(7) | 0.0365(3)  |

**Table 3. Bond lengths (Å) for bsc1.**

|         |            |          |            |
|---------|------------|----------|------------|
| C1-N1   | 1.488(6)   | C1-C2    | 1.510(6)   |
| C1-H1A  | 0.9700     | C1-H1B   | 0.9700     |
| C2-C3   | 1.519(7)   | C2-S1#1  | 1.829(5)   |
| C2-H2   | 0.9800     | C3-H3A   | 0.9600     |
| C3-H3B  | 0.9600     | C3-H3C   | 0.9600     |
| C4-N1   | 1.500(6)   | C4-H4A   | 0.9600     |
| C4-H4B  | 0.9600     | C4-H4C   | 0.9600     |
| C5-N1   | 1.481(6)   | C5-C5#1  | 1.511(10)  |
| C5-H5A  | 0.9700     | C5-H5B   | 0.9700     |
| N1-Ni1  | 1.939(4)   | Ni1-N1#1 | 1.939(4)   |
| Ni1-S1  | 2.1679(16) | Ni1-S1#1 | 2.1679(16) |
| S1-C2#1 | 1.829(5)   |          |            |

Symmetry transformations used to generate equivalent atoms (if any):

#1 -x+1,y,-z+1/2

**Table 4. Bond angles (°) for bscl.**

|            |               |            |       |             |
|------------|---------------|------------|-------|-------------|
| N1-C1-C2   | 111.5(4)      | N1-C1-H1A  | 109.3 | C2-C1-      |
| H1A        | 109.3         | N1-C1-H1B  | 109.3 | C2-C1-      |
| H1B        | 109.3         | H1A-C1-H1B | 108.0 | C3-C2-C1    |
| 110.5(4)   | C3-C2-S1#1    | 111.9(4)   |       | C1-C2-S1#1  |
| 108.2(4)   | C3-C2-H2      | 108.7      |       | C1-C2-H2    |
| 108.7      | S1#1-C2-H2    | 108.7      |       | C2-C3-H3A   |
| 109.5      | C2-C3-H3B     | 109.5      |       | H3A-C3-H3B  |
| 109.5      | C2-C3-H3C     | 109.5      |       | H3A-C3-H3C  |
| 109.5      | H3B-C3-H3C    | 109.5      |       | N1-C4-H4A   |
| 109.5      | N1-C4-H4B     | 109.5      |       | H4A-C4-H4B  |
| 109.5      | N1-C4-H4C     | 109.5      |       | H4A-C4-H4C  |
| 109.5      | H4B-C4-H4C    | 109.5      |       | N1-C5-C5#1  |
| 107.5(3)   | N1-C5-H5A     | 110.2      |       | C5#1-C5-H5A |
| 110.2      | N1-C5-H5B     | 110.2      |       | C5#1-C5-H5B |
| 110.2      | H5A-C5-H5B    | 108.5      |       | C1-N1-C5    |
| 111.7(4)   | C1-N1-C4      | 110.5(4)   |       | C5-N1-C4    |
| 109.7(4)   | C1-N1-Ni1     | 110.2(3)   |       | C5-N1-Ni1   |
| 108.2(3)   | C4-N1-Ni1     | 106.5(3)   |       | N1#1-Ni1-N1 |
| 87.6(2)    | N1#1-Ni1-S1   | 90.24(13)  |       | N1-Ni1-S1   |
| 163.74(11) | N1#1-Ni1-S1#1 | 163.74(11) |       | N1-Ni1-S1#1 |
| 90.24(13)  | S1-Ni1-S1#1   | 96.18(9)   |       | C2#1-S1-Ni1 |
| 99.36(18)  |               |            |       |             |

Symmetry transformations used to generate equivalent atoms (if any):

**#1 -x+1,y,-z+1/2**

**Table 5. Torsion angles (°) for bsc1.**

|                |           |                  |             |
|----------------|-----------|------------------|-------------|
| N1-C1-C2-C3    | 168.9(4)  | N1-C1-C2-S1#1    | 46.0(5)     |
| C2-C1-N1-C5    | -170.0(4) | C2-C1-N1-C4      | 67.7(5)     |
| C2-C1-N1-Ni1   | -49.7(4)  | C5#1-C5-N1-C1    | 159.6(4)    |
| C5#1-C5-N1-C4  | -77.5(5)  | C5#1-C5-N1-Ni1   | 38.2(5)     |
| C1-N1-Ni1-N1#1 | -136.3(3) | C5-N1-Ni1-N1#1   | -13.9(2)    |
| C4-N1-Ni1-N1#1 | 103.9(3)  | C1-N1-Ni1-S1     | 141.2(4)    |
| C5-N1-Ni1-S1   | -96.5(5)  | C4-N1-Ni1-S1     | 21.3(6)     |
| C1-N1-Ni1-S1#1 | 27.6(3)   | C5-N1-Ni1-S1#1   | 150.0(3)    |
| C4-N1-Ni1-S1#1 | -92.2(3)  | N1#1-Ni1-S1-C2#1 | -2.7(2)     |
| N1-Ni1-S1-C2#1 | 79.5(5)   | S1#1-Ni1-S1-C2#1 | -167.72(18) |

Symmetry transformations used to generate equivalent atoms (if any):

#1 -x+1,y,-z+1/2

**Table 6. Anisotropic atomic displacement parameters ( $\text{\AA}^2$ ) for bsc1.**

The anisotropic atomic displacement factor exponent takes the form:  $-2\pi^2 [ h^2a^2 U_{11} + \dots + 2hka^* b^* U_{12} ]$

|     | $U_{11}$<br>$U_{12}$     | $U_{22}$  | $U_{33}$  | $U_{23}$    | $U_{13}$    |
|-----|--------------------------|-----------|-----------|-------------|-------------|
| C1  | 0.035(3)<br>0.001(2)     | 0.037(3)  | 0.047(3)  | 0.009(2)    | 0.001(2)    |
| C2  | 0.036(3)<br>0.007(2)     | 0.047(3)  | 0.039(3)  | 0.001(2)    | 0.002(2)    |
| C3  | 0.077(4)<br>0.015(3)     | 0.062(4)  | 0.044(3)  | 0.009(3)    | 0.018(3)    |
| C4  | 0.036(3)<br>0.006(2)     | 0.044(3)  | 0.054(3)  | 0.007(2)    | -0.002(2)   |
| C5  | 0.044(3)<br>0.001(2)     | 0.022(2)  | 0.069(4)  | 0.005(2)    | -0.001(3)   |
| N1  | 0.0228(19)<br>0.0016(15) | 0.032(2)  | 0.047(2)  | -0.0001(19) | -0.0040(16) |
| Ni1 | 0.0238(4)<br>0.000       | 0.0174(4) | 0.0375(5) | 0.000       | 0.0006(3)   |
| S1  | 0.0402(7)<br>0.0007(5)   | 0.0260(6) | 0.0432(7) | 0.0031(5)   | 0.0079(5)   |

**Table 7. Hydrogen atom coordinates and isotropic atomic displacement parameters ( $\text{\AA}^2$ ) for bsc1.**

|     | x/a    | y/b     | z/c    | U     |
|-----|--------|---------|--------|-------|
| H1A | 0.4581 | 0.0167  | 0.4289 | 0.048 |
| H1B | 0.3359 | 0.0844  | 0.3786 | 0.048 |
| H2  | 0.5580 | 0.2794  | 0.4382 | 0.049 |
| H3A | 0.2631 | 0.3084  | 0.4558 | 0.091 |
| H3B | 0.3684 | 0.4453  | 0.4860 | 0.091 |
| H3C | 0.3706 | 0.2602  | 0.5180 | 0.091 |
| H4A | 0.7043 | 0.1544  | 0.3608 | 0.067 |
| H4B | 0.7268 | 0.0186  | 0.2986 | 0.067 |
| H4C | 0.6887 | -0.0397 | 0.3788 | 0.067 |
| H5A | 0.3729 | -0.1178 | 0.2912 | 0.054 |
| H5B | 0.5154 | -0.2030 | 0.3161 | 0.054 |



**Supplementary Information 7**

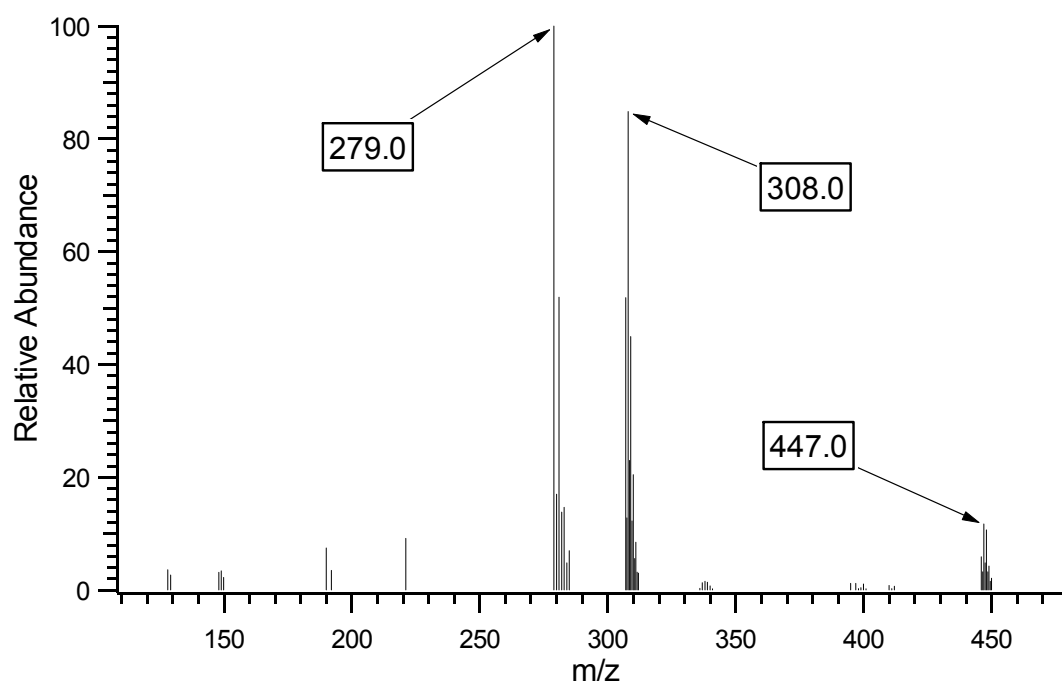

**Supplementary Information 7a:** ESI-MS of complex 1.

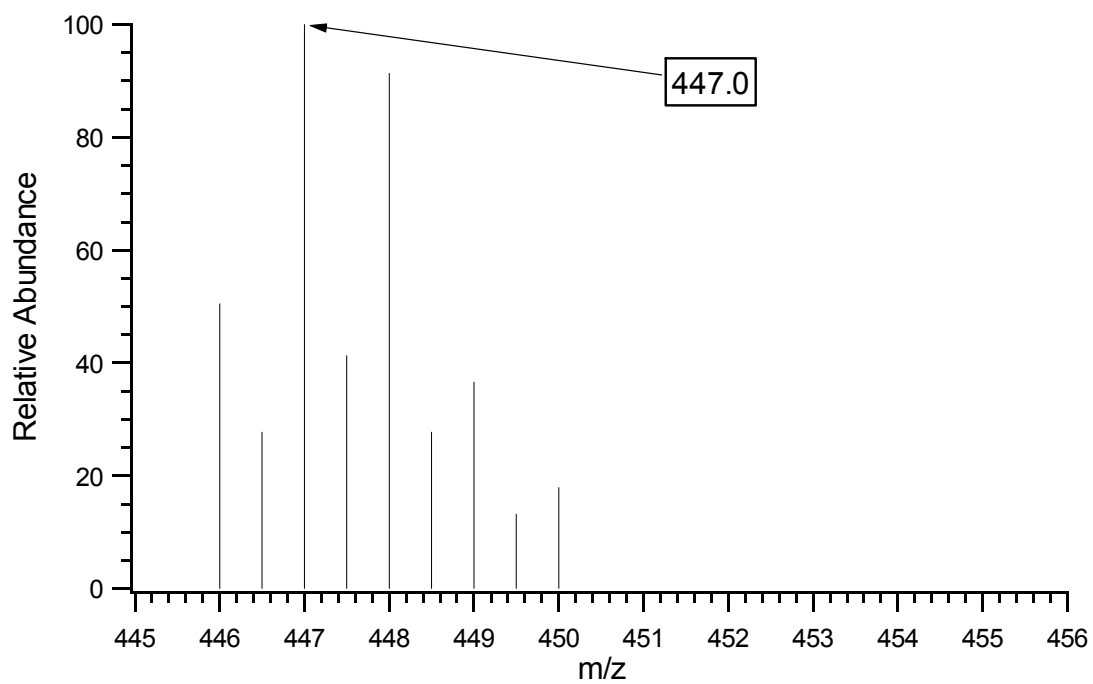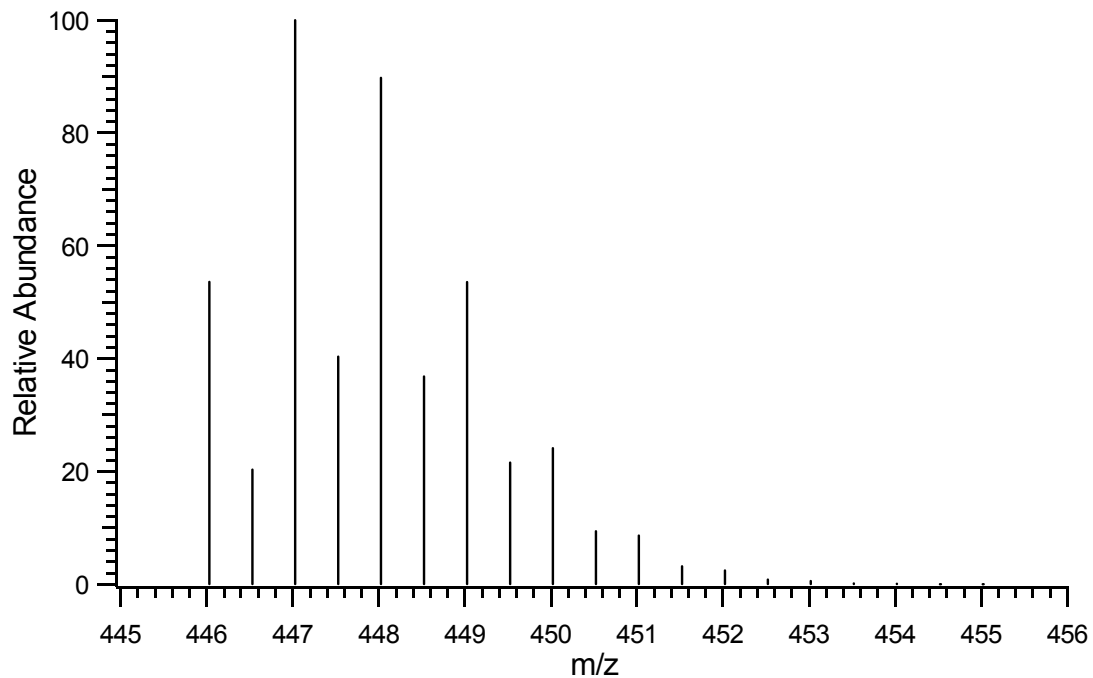

**Supplementary Information 7b:** Expanded ESI-MS of the  $m/z = 447.0$  isotopic cluster region (top), and the simulated isotopic fit for the cation  $(\text{Ni}_4\text{C}_{27}\text{H}_{60}\text{N}_6\text{S}_6) / 2^+$  (bottom).

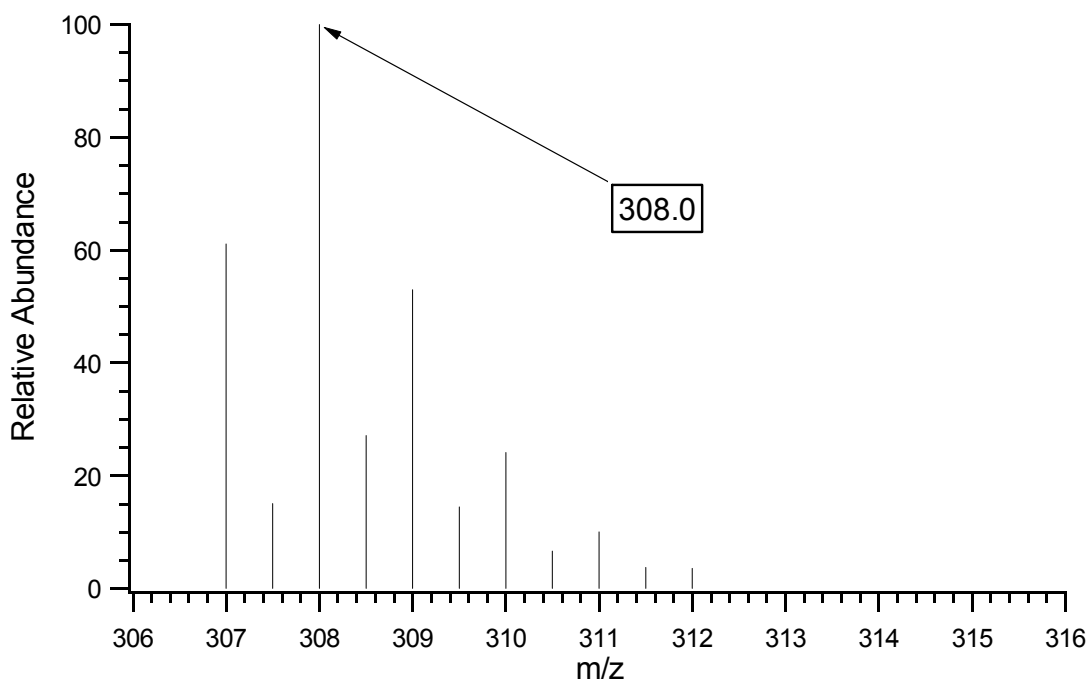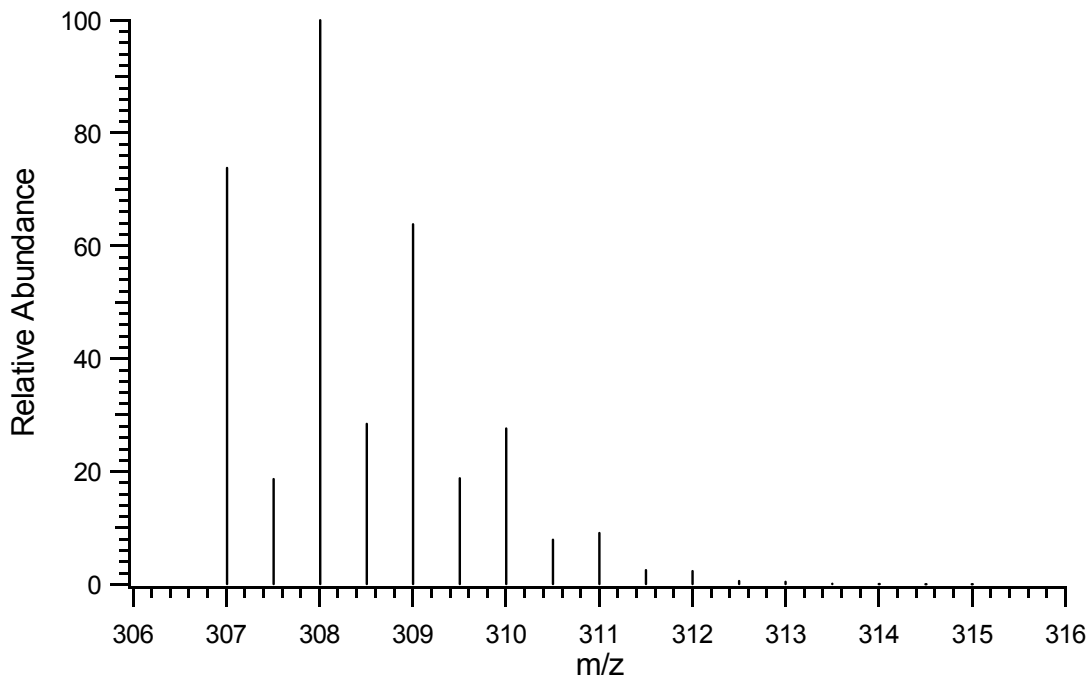

**Supplementary Information 7c:** Expanded ESI-MS of the  $m/z = 308.0$  isotopic cluster region (top), and the simulated isotopic fit for the cation  $(\text{Ni}_3\text{C}_{18}\text{H}_{40}\text{N}_4\text{S}_4) / 2)^+$  (bottom).

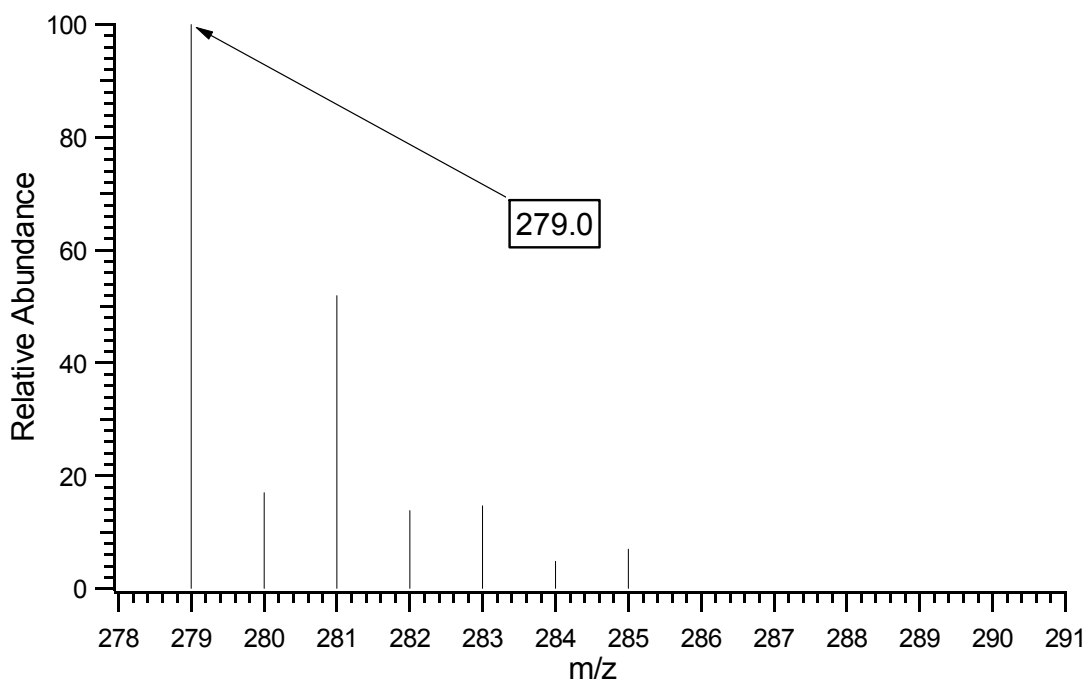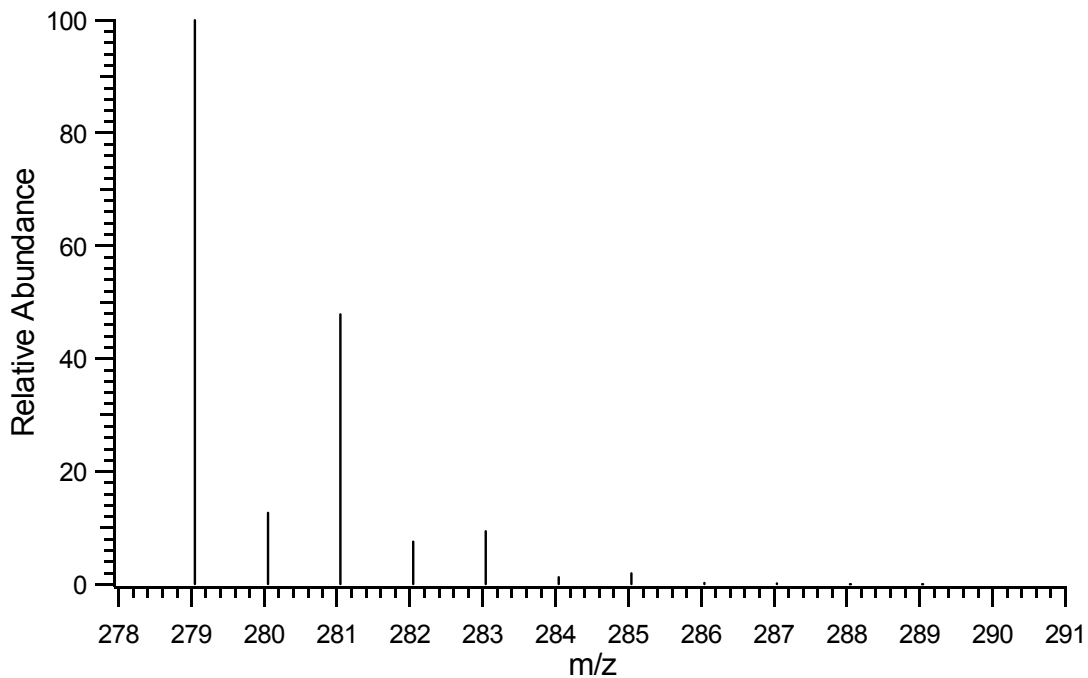

**Supplementary Information 7d:** Expanded ESI-MS of the  $m/z = 279.0$  isotopic cluster region (top), and the simulated isotopic fit for the cation  $(\text{NiC}_9\text{H}_{21}\text{N}_2\text{S}_2)^+$  (bottom).

### **Supplementary Information 8**

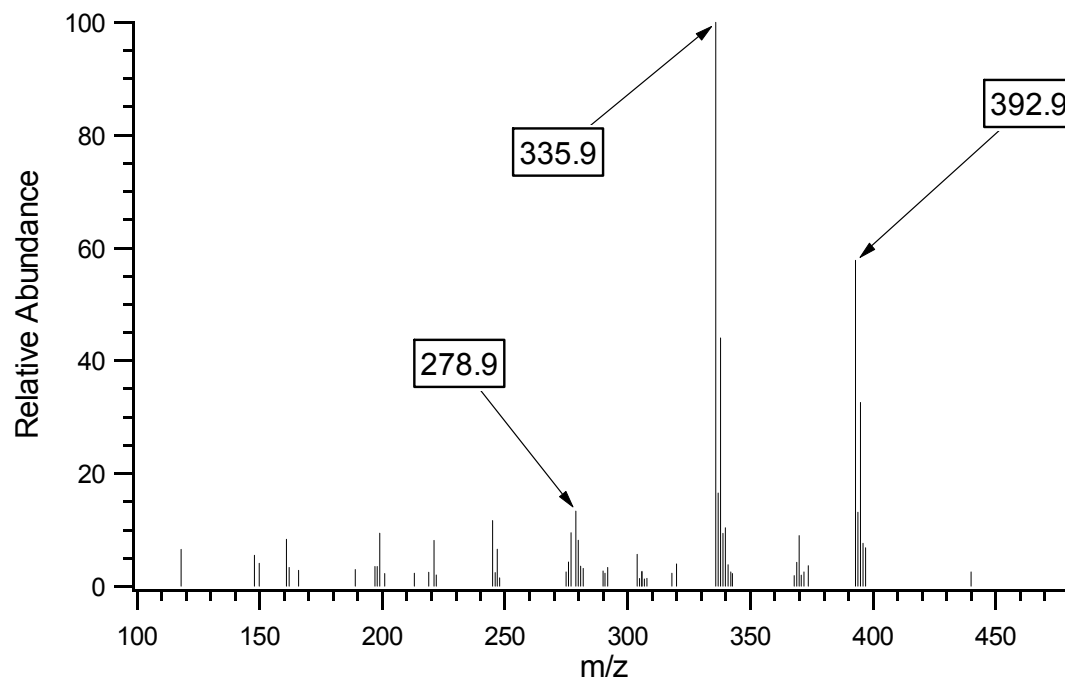

**Supplementary Information 8a:** ESI-MS of complex 6.

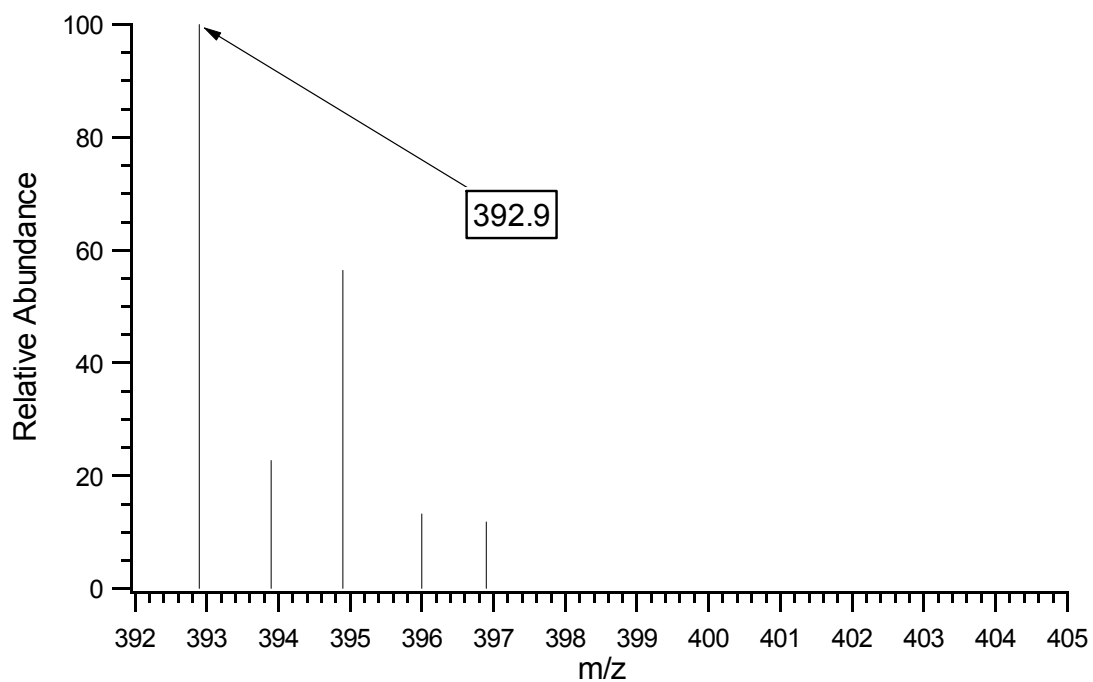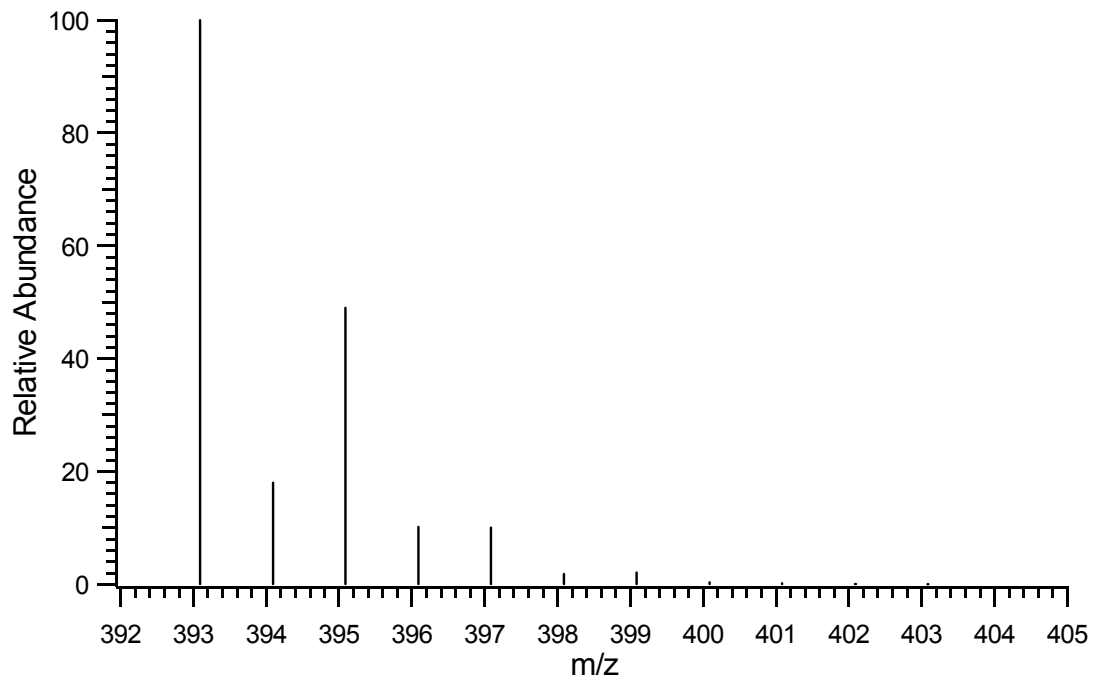

**Supplementary Information 8b:** Expanded ESI-MS of the  $m/z = 392.9$  isotopic cluster region (top), and the simulated isotopic fit for the cation  $(\text{NiC}_{13}\text{H}_{27}\text{N}_4\text{O}_2\text{S}_2)^+$  (bottom).
